# Supplementary material for: Hygiene management for long-term ventilated persons in the home health care setting: a scoping review
Source: PubMed Central journal article supplement (PMC8864850; doi:10.1186/s12913-022-07643-w), 2022-02-23
Supplement: 12913_2022_7643_MOESM1_ESM.pdf [file 12913_2022_7643_MOESM1_ESM.pdf]

**Appendix 1: Full search strategy for CINAHL. Hygiene Management for Long-term Ventilated Persons in the Home Health Care Setting: A Scoping Review**

Search date: 22.07.2020

| Search number  | Mesh term, text word and combinations                                                                 | Results          |
|----------------|-------------------------------------------------------------------------------------------------------|------------------|
|                | <b>Home mechanical ventilation</b>                                                                    |                  |
| 1              | Artificial respiration*                                                                               | 12,341           |
| 2              | Respiration artificial                                                                                | 21,610           |
| 3              | Mechanical ventilation*                                                                               | 35,977           |
| 4              | Home mechanical ventilation                                                                           | 417              |
| 5              | HMV                                                                                                   | 199              |
| 6              | Invasive ventilation                                                                                  | 2,949            |
| 7              | Noninvasive ventilation                                                                               | 3,217            |
| 8              | Long term ventilation                                                                                 | 459              |
| 9              | Home care ventilation                                                                                 | 16               |
| <b>OR</b>      | 1-9                                                                                                   | <b>44,816</b>    |
|                | <b>Hygiene management</b>                                                                             |                  |
| 10             | Hygiene                                                                                               | 105,077          |
| 11             | Hygiene management                                                                                    | 194              |
| 12             | Hand hygiene                                                                                          | 11,694           |
| 13             | Infection*                                                                                            | 552,791          |
| 14             | Infection prevention                                                                                  | 73,483           |
| 15             | Infection control                                                                                     | 68,730           |
| 16             | Health care associated infection                                                                      | 25,013           |
| <b>OR</b>      | 10-16                                                                                                 | <b>621,634</b>   |
| 17             | MRSA                                                                                                  | 14,939           |
| 18             | Methicillin-Resistant Staphylococcus aureus                                                           | 12,613           |
| <b>AND</b>     | 17-18                                                                                                 | <b>8,842</b>     |
| <b>OR</b>      | 10-16 OR 17-18                                                                                        | <b>622,287</b>   |
|                | <b>Setting</b>                                                                                        |                  |
| 19             | Home                                                                                                  | 605,744          |
| 20             | Home health nursing                                                                                   | 610              |
| 21             | Home nursing                                                                                          | 26,808           |
| 22             | Home care service*                                                                                    | 20,267           |
| 23             | Home care agencies                                                                                    | 5,290            |
| 24             | Home care aides                                                                                       | 1,120            |
| 25             | Communal living arrangements                                                                          | 66               |
| 26             | Small scale living                                                                                    | 41               |
| 27             | Flat                                                                                                  | 38,504           |
| 38             | Outpatient                                                                                            | 198,309          |
| 29             | Homebo#nd person*                                                                                     | 55               |
| <b>OR</b>      | 19-29                                                                                                 | <b>769,475</b>   |
|                | <b>exclusion under 18 years incl. ICU</b>                                                             |                  |
| 30             | Neonate*                                                                                              | 42,085           |
| 31             | children                                                                                              | 1,491,337        |
| 32             | Adolescents                                                                                           | 666,953          |
| 33             | Pediatric*                                                                                            | 566,434          |
| <b>OR</b>      | 30-33                                                                                                 | <b>1,635,014</b> |
| 34             | ICU                                                                                                   | 155,522          |
| 35             | Intensive care unit                                                                                   | 132,597          |
| <b>AND</b>     | 34-35                                                                                                 | <b>133,249</b>   |
| <b>OR</b>      | 30-33 OR 34-35                                                                                        | <b>1,703,425</b> |
| <b>AND NOT</b> | Home mechanical ventilation AND Hygiene management AND Setting NOT exclusion under 18 years incl. ICU | <b>661</b>       |

**Appendix 1: Full search strategy for CINAHL.** Hygiene Management for Long-term Ventilated Persons in the Home Health Care Setting: A Scoping Review

**Search term**

(Artificial respiration\* OR Respiration artificial OR Mechanical ventilation\* OR Home mechanical ventilation OR HMV OR Invasive ventilation OR Noninvasive ventilation OR Long term ventilation OR Home care ventilation) AND (Hygiene OR Hygiene management OR Hand hygiene OR Infection\* OR Infection prevention OR Infection control OR Health care associated infection OR (MRSA AND Methicillin-Resistant Staphylococcus aureus)) AND (Home OR Home health nursing OR Home nursing OR Home care service\* OR Home care agencies OR Home care aides OR Communal living arrangements OR Small scale living OR Flat OR Outpatient OR Homebo#nd person\*) NOT (neonate\* OR children OR adolescent OR pediatric\* OR (ICU AND intensive care unit))
