# Supplementary material for: Hygiene management for long-term ventilated persons in the home health care setting: a scoping review
Source: PubMed Central journal article supplement (PMC8864850; doi:10.1186/s12913-022-07643-w), 2022-02-23
Supplement: 12913_2022_7643_MOESM3_ESM.pdf [file 12913_2022_7643_MOESM3_ESM.pdf]

**Appendix 3: Data Charting Sheets.** Hygiene Management for Long-term Ventilated Persons in the Home Health Care Setting: A Scoping Review

All articles in alphabetical order

| <b>Data charting sheet - for health care professional, patients, relatives</b> |                                                                                                                                                                                                                                                                                                                                                                                                                                                                                                                                                                                                                                                                                                                                                                                                                                                                                                                                                                                                                                                                                                                                                                                                                                                                                                                                                                                                     |
|--------------------------------------------------------------------------------|-----------------------------------------------------------------------------------------------------------------------------------------------------------------------------------------------------------------------------------------------------------------------------------------------------------------------------------------------------------------------------------------------------------------------------------------------------------------------------------------------------------------------------------------------------------------------------------------------------------------------------------------------------------------------------------------------------------------------------------------------------------------------------------------------------------------------------------------------------------------------------------------------------------------------------------------------------------------------------------------------------------------------------------------------------------------------------------------------------------------------------------------------------------------------------------------------------------------------------------------------------------------------------------------------------------------------------------------------------------------------------------------------------|
| <b>Study description</b>                                                       |                                                                                                                                                                                                                                                                                                                                                                                                                                                                                                                                                                                                                                                                                                                                                                                                                                                                                                                                                                                                                                                                                                                                                                                                                                                                                                                                                                                                     |
| <b>First author</b>                                                            | Banfi, Paolo                                                                                                                                                                                                                                                                                                                                                                                                                                                                                                                                                                                                                                                                                                                                                                                                                                                                                                                                                                                                                                                                                                                                                                                                                                                                                                                                                                                        |
| <b>Title</b>                                                                   | Home Treatment of Infection-Related Acute Respiratory Failure in Kyphoscoliotic Patients on Long-Term Mechanical Ventilation                                                                                                                                                                                                                                                                                                                                                                                                                                                                                                                                                                                                                                                                                                                                                                                                                                                                                                                                                                                                                                                                                                                                                                                                                                                                        |
| <b>Year</b>                                                                    | 2007                                                                                                                                                                                                                                                                                                                                                                                                                                                                                                                                                                                                                                                                                                                                                                                                                                                                                                                                                                                                                                                                                                                                                                                                                                                                                                                                                                                                |
| <b>Country</b>                                                                 | France                                                                                                                                                                                                                                                                                                                                                                                                                                                                                                                                                                                                                                                                                                                                                                                                                                                                                                                                                                                                                                                                                                                                                                                                                                                                                                                                                                                              |
| <b>Study aims</b>                                                              | To study the possibility of home treatment of infection-related ARF in kyphoscoliotic patients on long term mechanical ventilation                                                                                                                                                                                                                                                                                                                                                                                                                                                                                                                                                                                                                                                                                                                                                                                                                                                                                                                                                                                                                                                                                                                                                                                                                                                                  |
| <b>Methodology/Measures</b>                                                    | <p><b>Study design:</b> prospective cohort study</p> <p><b>Study period:</b> 1998-2002</p> <p><b>Study inclusion:</b> Tachypnea &gt;30 breaths/min, Cyanosis, Purulent secretions, Cough, Fever</p> <p><b>Inclusion process:</b></p> <ul style="list-style-type: none"> <li>- Chest specialist, GP + nurse examined patient at home: Arterial blood samples, ECG readings + expectorated sputum samples</li> <li>- MV was administered continuously until the morning + pulse oximetry was recorded all night<br/>→ if patient showed improvement in arterial blood gas values 1 hour after initiating mechanical ventilation + mean nocturnal pulse oximetry was &gt;90%, patient was invited to the home treatment protocol</li> </ul> <p><b>Treatment of included patients:</b></p> <ul style="list-style-type: none"> <li>- progressively decrease daily duration of MV according to their tolerance of spontaneous breathing under supervision of med. staff<br/>→ Treatment with antibiotics + Albuterol inhaler (<i>s. cat. "Handling of medication"</i>)</li> </ul> <p><b>Hypothesis:</b></p> <ul style="list-style-type: none"> <li>- Home care of ARF can be as safe + effective as hospital care</li> </ul> <p><b>Measures:</b></p> <ul style="list-style-type: none"> <li>- 1x/ week: arterial blood samples were collected after 1 hour of spontaneous breathing without MV</li> </ul> |

**Appendix 3: Data Charting Sheets.** Hygiene Management for Long-term Ventilated Persons in the Home Health Care Setting: A Scoping Review

|                                                                                                                             |                                                                                                                                                                                                                                                                                                                                                                                                                                                                                                                                                                                                                                                                                                                          |
|-----------------------------------------------------------------------------------------------------------------------------|--------------------------------------------------------------------------------------------------------------------------------------------------------------------------------------------------------------------------------------------------------------------------------------------------------------------------------------------------------------------------------------------------------------------------------------------------------------------------------------------------------------------------------------------------------------------------------------------------------------------------------------------------------------------------------------------------------------------------|
|                                                                                                                             | - 2 weeks after starting antibiotics: sputum collection + culture                                                                                                                                                                                                                                                                                                                                                                                                                                                                                                                                                                                                                                                        |
| <b>Setting, Participants</b>                                                                                                |                                                                                                                                                                                                                                                                                                                                                                                                                                                                                                                                                                                                                                                                                                                          |
| <b>Sample size</b>                                                                                                          | <b>7 patients</b><br><br>(Background: between 1998-2002 <b>8/195 patients</b> within the program of long-term MV had an infection-related ARF + were therefore eligible for this study; 1 was excluded because he refused treatment at home)                                                                                                                                                                                                                                                                                                                                                                                                                                                                             |
| <b>Sex</b>                                                                                                                  | 3 women, 5 men                                                                                                                                                                                                                                                                                                                                                                                                                                                                                                                                                                                                                                                                                                           |
| <b>Age of participation</b>                                                                                                 | 61 years (mean)                                                                                                                                                                                                                                                                                                                                                                                                                                                                                                                                                                                                                                                                                                          |
| <b>Kind of disease</b>                                                                                                      | <ul style="list-style-type: none"> <li>- Idiopathic severe kyphoscoliosis (Cobb angle &gt;70°)</li> <li>- Developed infection-related ARF during a 4 year period</li> </ul>                                                                                                                                                                                                                                                                                                                                                                                                                                                                                                                                              |
| <b>Kind of artificial ventilation (incl. duration)</b>                                                                      | <p><b>All patients</b> had mechanical ventilation for 31 months (mean)</p> <ul style="list-style-type: none"> <li>- <b>7/8</b> NPPV + commercial mask</li> <li>- <b>3/8</b> volume-assist ventilator</li> <li>- <b>4/8</b> pressure assist ventilator + circuit that includes an expiratory valve (backup rate of mean 16 breaths/min)</li> <li>- <b>1/8</b> invasively ventilated</li> </ul> <p><b>During study:</b></p> <ul style="list-style-type: none"> <li>- Nearly continuous MV (&gt;20h/d) for the first week with ventilator settings used in their baseline condition</li> <li>- Progressively decreasing daily duration of mechanical ventilation according to tolerance of spontaneous breathing</li> </ul> |
| <b>Family participation</b>                                                                                                 | Not specified                                                                                                                                                                                                                                                                                                                                                                                                                                                                                                                                                                                                                                                                                                            |
| <b>Concept of home-based setting/Licensed beds</b>                                                                          | At the patient's home                                                                                                                                                                                                                                                                                                                                                                                                                                                                                                                                                                                                                                                                                                    |
| <b>Professions/Qualifications involved/Duration professional employment</b>                                                 | Staff involved in the study: <b>Nurse, GP + chest specialist</b> evaluated + supervised the patient at home <ul style="list-style-type: none"> <li>- Nurse: visited the patient's home 3x/d</li> <li>- GP: visited patient 2x/week</li> <li>- No emergency visit was necessary</li> </ul>                                                                                                                                                                                                                                                                                                                                                                                                                                |
| <b>Cooperation (e.g. Lung specialist, Weaning centre)</b>                                                                   | Not specified                                                                                                                                                                                                                                                                                                                                                                                                                                                                                                                                                                                                                                                                                                            |
| <b>Key Findings - Hygiene management</b>                                                                                    |                                                                                                                                                                                                                                                                                                                                                                                                                                                                                                                                                                                                                                                                                                                          |
| <b>Quality management for hygiene, e.g. Infection control practitioner, duration h for infection prevention and control</b> |                                                                                                                                                                                                                                                                                                                                                                                                                                                                                                                                                                                                                                                                                                                          |
| <b>... - Training /education (incl. in- outdoor training)</b>                                                               | Not specified                                                                                                                                                                                                                                                                                                                                                                                                                                                                                                                                                                                                                                                                                                            |
| <b>... - Staff hygiene (incl. PPE, Hand hygiene)</b>                                                                        | Not specified                                                                                                                                                                                                                                                                                                                                                                                                                                                                                                                                                                                                                                                                                                            |
| <b>... - Relative/visitors (incl. Physicians/Therapists)</b>                                                                | Not specified                                                                                                                                                                                                                                                                                                                                                                                                                                                                                                                                                                                                                                                                                                            |

### Appendix 3: Data Charting Sheets. Hygiene Management for Long-term Ventilated Persons in the Home Health Care Setting: A Scoping Review

|                                                                                                                                                                                                                                                                                                                                                                                                                                                                                                                                                                                                                                                                                                                                                                                                        |                                                                                                                                                                                                                                                                                                                                  |
|--------------------------------------------------------------------------------------------------------------------------------------------------------------------------------------------------------------------------------------------------------------------------------------------------------------------------------------------------------------------------------------------------------------------------------------------------------------------------------------------------------------------------------------------------------------------------------------------------------------------------------------------------------------------------------------------------------------------------------------------------------------------------------------------------------|----------------------------------------------------------------------------------------------------------------------------------------------------------------------------------------------------------------------------------------------------------------------------------------------------------------------------------|
| ... - Cleaning and disinfection aspects                                                                                                                                                                                                                                                                                                                                                                                                                                                                                                                                                                                                                                                                                                                                                                | Not specified                                                                                                                                                                                                                                                                                                                    |
| ... - Handling of medical devices                                                                                                                                                                                                                                                                                                                                                                                                                                                                                                                                                                                                                                                                                                                                                                      |                                                                                                                                                                                                                                                                                                                                  |
| ... - Waste management                                                                                                                                                                                                                                                                                                                                                                                                                                                                                                                                                                                                                                                                                                                                                                                 | Not specified                                                                                                                                                                                                                                                                                                                    |
| ... - Infectious critical activities (incl. MRSA, Screening, Surveillance)                                                                                                                                                                                                                                                                                                                                                                                                                                                                                                                                                                                                                                                                                                                             | Not specified                                                                                                                                                                                                                                                                                                                    |
| ... - Caring for persons (prevention and infection control)                                                                                                                                                                                                                                                                                                                                                                                                                                                                                                                                                                                                                                                                                                                                            | Not specified                                                                                                                                                                                                                                                                                                                    |
| ... - Handling of medication                                                                                                                                                                                                                                                                                                                                                                                                                                                                                                                                                                                                                                                                                                                                                                           | <p><b>Antibiotics</b></p> <ul style="list-style-type: none"> <li>- All patients</li> <li>- Duration: 2 weeks</li> <li>- Dose: Clarithromycin 500mg 2x/d; intramuscular ceftazidime 1g 3x/d</li> </ul> <p><b>Albuterol</b></p> <ul style="list-style-type: none"> <li>- Metered-dose-inhaler during MV</li> <li>- 4x/d</li> </ul> |
| ... - Laundry hygiene                                                                                                                                                                                                                                                                                                                                                                                                                                                                                                                                                                                                                                                                                                                                                                                  | Not specified                                                                                                                                                                                                                                                                                                                    |
| ... - Kitchen hygiene                                                                                                                                                                                                                                                                                                                                                                                                                                                                                                                                                                                                                                                                                                                                                                                  | Not specified                                                                                                                                                                                                                                                                                                                    |
| <b>Conclusion/Limitations</b>                                                                                                                                                                                                                                                                                                                                                                                                                                                                                                                                                                                                                                                                                                                                                                          |                                                                                                                                                                                                                                                                                                                                  |
| <p><b>Conclusions:</b></p> <ul style="list-style-type: none"> <li>- 7/7 kyphoscoliotic patients on long-term MV suffered from infection-related ARF + were successfully treated at home</li> <li>- Treatment with antibiotics + NPPV (in 6/7 cases)</li> <li>- Increase of daily duration of MV without any change of ventilator settings was well tolerated by patients (familiarity)</li> <li>- Cost-saving treatment at home: average duration of hospitalization of these patients is 2-3 weeks</li> </ul> <p><b>Limitation:</b> no control group</p> <p><b>Notes for review:</b></p> <ul style="list-style-type: none"> <li>- No hygiene-management</li> <li>- Specific group of patients</li> <li>- Main outcome: infection-treatment at home is feasible, efficient + cost-effective</li> </ul> |                                                                                                                                                                                                                                                                                                                                  |

#### Abbreviations:

ARF = acute respiratory failure

NPPV = noninvasive positive pressure ventilation

GP = general practitioner

MV = mechanical ventilation

ECG = electrocardiogram

**Appendix 3: Data Charting Sheets.** Hygiene Management for Long-term Ventilated Persons in the Home Health Care Setting: A Scoping Review

| Data charting sheet - for health care professional, patients, relatives     |                                                                                                                                                                                                                                                                                                                                                                                                                                              |                                                                                                                                                                                                                                                                                                                           |  |                    |                   |      |                                                                    |
|-----------------------------------------------------------------------------|----------------------------------------------------------------------------------------------------------------------------------------------------------------------------------------------------------------------------------------------------------------------------------------------------------------------------------------------------------------------------------------------------------------------------------------------|---------------------------------------------------------------------------------------------------------------------------------------------------------------------------------------------------------------------------------------------------------------------------------------------------------------------------|--|--------------------|-------------------|------|--------------------------------------------------------------------|
| <b>Study description</b>                                                    |                                                                                                                                                                                                                                                                                                                                                                                                                                              |                                                                                                                                                                                                                                                                                                                           |  |                    |                   |      |                                                                    |
| <b>First author</b>                                                         | Cahill, Christine K.                                                                                                                                                                                                                                                                                                                                                                                                                         |                                                                                                                                                                                                                                                                                                                           |  |                    |                   |      |                                                                    |
| <b>Title</b>                                                                | California Skilled Nursing Facilities – A Survey of Infection Prevention and Control Practices and Educational Needs                                                                                                                                                                                                                                                                                                                         |                                                                                                                                                                                                                                                                                                                           |  |                    |                   |      |                                                                    |
| <b>Year</b>                                                                 | 1997                                                                                                                                                                                                                                                                                                                                                                                                                                         |                                                                                                                                                                                                                                                                                                                           |  |                    |                   |      |                                                                    |
| <b>Country</b>                                                              | USA                                                                                                                                                                                                                                                                                                                                                                                                                                          |                                                                                                                                                                                                                                                                                                                           |  |                    |                   |      |                                                                    |
| <b>Study aims</b>                                                           | <ul style="list-style-type: none"> <li>- To assess characteristics of SNF infection prevention + control programs</li> <li>- To determine policies for admitting + placing of MRSA-/ VRE-colonized patients</li> <li>- To determine educational needs of the respondents possible for infection prevention + control programs in SNF</li> </ul>                                                                                              |                                                                                                                                                                                                                                                                                                                           |  |                    |                   |      |                                                                    |
| <b>Methodology/Measures</b>                                                 | <p><b>Study design:</b> observational/ descriptive study</p> <p><b>Method:</b> quantitative survey</p> <ul style="list-style-type: none"> <li>- Among ICs in all Californian SNFs</li> <li>- Survey included 3 parts: facility biographical profile, antibiotic resistant microorganism profile + educational needs assessment</li> </ul> <p>→ a total of 1.454 surveys were mailed to free-standing + hospital-based SNF (no reminders)</p> |                                                                                                                                                                                                                                                                                                                           |  |                    |                   |      |                                                                    |
| <b>Setting, Participants</b>                                                |                                                                                                                                                                                                                                                                                                                                                                                                                                              |                                                                                                                                                                                                                                                                                                                           |  |                    |                   |      |                                                                    |
| <b>Sample size</b>                                                          | 444 SNF (response rate 30.5%) <ul style="list-style-type: none"> <li>- 283 (63.7%) free-standing</li> <li>- 161 (23.2%) hospital-based</li> <li>- 58 (13.1%) other (veterans administration or not specified)</li> </ul>                                                                                                                                                                                                                     |                                                                                                                                                                                                                                                                                                                           |  |                    |                   |      |                                                                    |
| <b>Sex</b>                                                                  | Not specified                                                                                                                                                                                                                                                                                                                                                                                                                                |                                                                                                                                                                                                                                                                                                                           |  |                    |                   |      |                                                                    |
| <b>Age of participation</b>                                                 | Not specified                                                                                                                                                                                                                                                                                                                                                                                                                                |                                                                                                                                                                                                                                                                                                                           |  |                    |                   |      |                                                                    |
| <b>Kind of disease</b>                                                      | Not specified                                                                                                                                                                                                                                                                                                                                                                                                                                |                                                                                                                                                                                                                                                                                                                           |  |                    |                   |      |                                                                    |
| <b>Kind of artificial ventilation (incl. duration)</b>                      | Not specified                                                                                                                                                                                                                                                                                                                                                                                                                                |                                                                                                                                                                                                                                                                                                                           |  |                    |                   |      |                                                                    |
| <b>Family participation</b>                                                 | Not specified                                                                                                                                                                                                                                                                                                                                                                                                                                |                                                                                                                                                                                                                                                                                                                           |  |                    |                   |      |                                                                    |
| <b>Concept of home-based setting/Licensed beds</b>                          | Skilled nursing facilities (SNF) <ul style="list-style-type: none"> <li>- Hospital-based distinct-part (HB) or free-standing (FS)</li> <li>- Licenced beds: 10 to &gt;350; most SNF (68%) &lt; 99 beds</li> </ul> <i>(more details s. Tab 1+2)</i>                                                                                                                                                                                           |                                                                                                                                                                                                                                                                                                                           |  |                    |                   |      |                                                                    |
| <b>Professions/Qualifications involved/Duration professional employment</b> |                                                                                                                                                                                                                                                                                                                                                                                                                                              |                                                                                                                                                                                                                                                                                                                           |  |                    |                   |      |                                                                    |
|                                                                             |                                                                                                                                                                                                                                                                                                                                                                                                                                              | <table border="1"> <thead> <tr> <th></th> <th>Hospital-based SNF</th> <th>Free-standing SNF</th> </tr> </thead> <tbody> <tr> <td>ICPs</td> <td>- 88/102 (86.3%) associate degree or higher in “nursing education”</td> <td>- 203/278 (73%) associate degree or higher in “nursing education”</td> </tr> </tbody> </table> |  | Hospital-based SNF | Free-standing SNF | ICPs | - 88/102 (86.3%) associate degree or higher in “nursing education” |
|                                                                             | Hospital-based SNF                                                                                                                                                                                                                                                                                                                                                                                                                           | Free-standing SNF                                                                                                                                                                                                                                                                                                         |  |                    |                   |      |                                                                    |
| ICPs                                                                        | - 88/102 (86.3%) associate degree or higher in “nursing education”                                                                                                                                                                                                                                                                                                                                                                           | - 203/278 (73%) associate degree or higher in “nursing education”                                                                                                                                                                                                                                                         |  |                    |                   |      |                                                                    |

**Appendix 3: Data Charting Sheets.** Hygiene Management for Long-term Ventilated Persons in the Home Health Care Setting: A Scoping Review

|                                                                                                                             |                                                                                                                                                                                                                                                                                                                       |                                                                                                                                                    |                                                                                                                                                                |
|-----------------------------------------------------------------------------------------------------------------------------|-----------------------------------------------------------------------------------------------------------------------------------------------------------------------------------------------------------------------------------------------------------------------------------------------------------------------|----------------------------------------------------------------------------------------------------------------------------------------------------|----------------------------------------------------------------------------------------------------------------------------------------------------------------|
|                                                                                                                             |                                                                                                                                                                                                                                                                                                                       | - 39/88 (38.2%) bachelor's degree in "nursing"<br>- ??/?? (13.7%) licensed "vocational nurses"                                                     | - 79/278 (28.4%) bachelor's degree in "nursing"<br>- 75/278 (27%) licensed "vocational nurses"                                                                 |
|                                                                                                                             | Responsibilities                                                                                                                                                                                                                                                                                                      | -79/102 responsible for at least one other non-infection –control-related position (Director Staff Development 27.8%; Employee Health Nurse 16.5%) | - 236/278 responsible for at least one other non-infection –control-related position (Director Staff Development 43.6%; Director Nursing Administration 26.7%) |
|                                                                                                                             | ICP-experience (s. Tab. 4)                                                                                                                                                                                                                                                                                            | - 54/96 (56.2%) ICP < 5 years<br>- 19/96 (19.8%) ICP < 1 year                                                                                      | - 184/265 ICP < 5 years<br>- 72/26 ICP < 1 year                                                                                                                |
|                                                                                                                             | Memberships                                                                                                                                                                                                                                                                                                           | - 59/99 membership APIC<br>- 27/59 certified by CBIC                                                                                               | - 41/269 (15%) membership APIC<br>- 7/41 (17%) certified by CBIC                                                                                               |
| <b>Cooperation (e.g. Lung specialist, Weaning centre)</b>                                                                   | Not specified                                                                                                                                                                                                                                                                                                         |                                                                                                                                                    |                                                                                                                                                                |
| <b>Key Findings - Hygiene management</b>                                                                                    |                                                                                                                                                                                                                                                                                                                       |                                                                                                                                                    |                                                                                                                                                                |
| <b>Quality management for hygiene, e.g. Infection control practitioner, duration h for infection prevention and control</b> |                                                                                                                                                                                                                                                                                                                       | <b>Hospital-based SNF</b>                                                                                                                          | <b>Free-standing SNF</b>                                                                                                                                       |
|                                                                                                                             | Average h/week for infection control + prevention activities                                                                                                                                                                                                                                                          | - 35/97 (36.1%) < 5h<br>- 22/97 (22.7%) < 2h                                                                                                       | - 127/267 (47.7%) < 5h<br>- 58/267 (21.7%) < 2h                                                                                                                |
|                                                                                                                             | ICPs                                                                                                                                                                                                                                                                                                                  | Available                                                                                                                                          |                                                                                                                                                                |
|                                                                                                                             | Programs                                                                                                                                                                                                                                                                                                              | Infection Prevention + Control Program (required by Health Care Financing Administration; HCFA)<br>- Staff hygiene<br>- Isolation procedures       |                                                                                                                                                                |
| <b>... - Training /education (incl. in- outdoor training)</b>                                                               | <b>Educational needs for infection prevention + control rated by ICPs:</b><br>- <b>New employee + annual education programs:</b> Hand washing (87.3%), pathogens standard (84.6%) + tuberculosis control program (83.6% of ICPs rated 4 = very important)<br>- <b>Employee health:</b> tuberculosis screening (76.7%) |                                                                                                                                                    |                                                                                                                                                                |

**Appendix 3: Data Charting Sheets.** Hygiene Management for Long-term Ventilated Persons in the Home Health Care Setting: A Scoping Review

|                                                                                                                                                                                                                                                                                                                                                                                                                                   |                                                                                                                                                                                                                                                                                                                                                                                                                                                                                                                                                                                                                                                                                 |                                                                                                                                                                                                    |                                                                                                                                                                                                        |
|-----------------------------------------------------------------------------------------------------------------------------------------------------------------------------------------------------------------------------------------------------------------------------------------------------------------------------------------------------------------------------------------------------------------------------------|---------------------------------------------------------------------------------------------------------------------------------------------------------------------------------------------------------------------------------------------------------------------------------------------------------------------------------------------------------------------------------------------------------------------------------------------------------------------------------------------------------------------------------------------------------------------------------------------------------------------------------------------------------------------------------|----------------------------------------------------------------------------------------------------------------------------------------------------------------------------------------------------|--------------------------------------------------------------------------------------------------------------------------------------------------------------------------------------------------------|
|                                                                                                                                                                                                                                                                                                                                                                                                                                   | <ul style="list-style-type: none"> <li>- <b>Resident's Health:</b> tuberculosis screening for new admission (76.9%)</li> <li>- <b>Antibiotic-Resistant Microorganisms:</b> admitting patients with MRSA/ VRE (81.4%)</li> <li>- <b>Antibiotic Utilization Program:</b> appropriate use of antibiotics (80.6%)</li> <li>- <b>Microbiology:</b> colonisation vs. infection (75.7%)</li> <li>- <b>Surveillance Program:</b> collecting, analysing + reporting data (74.6%)</li> <li>- <b>Isolation Precautions:</b> standard isolation precautions (80.1%)</li> </ul> <p>(topics from APIC-Guideline for infection prevention + control) <i>(for more subtopics s. Tab. 5)</i></p> |                                                                                                                                                                                                    |                                                                                                                                                                                                        |
| ... - Staff hygiene (incl. PPE, Hand hygiene)                                                                                                                                                                                                                                                                                                                                                                                     | Not specified                                                                                                                                                                                                                                                                                                                                                                                                                                                                                                                                                                                                                                                                   |                                                                                                                                                                                                    |                                                                                                                                                                                                        |
| ... - Relative/visitors (incl. Physicians/Therapists)                                                                                                                                                                                                                                                                                                                                                                             | Not specified                                                                                                                                                                                                                                                                                                                                                                                                                                                                                                                                                                                                                                                                   |                                                                                                                                                                                                    |                                                                                                                                                                                                        |
| ... - Cleaning and disinfection aspects                                                                                                                                                                                                                                                                                                                                                                                           | Not specified                                                                                                                                                                                                                                                                                                                                                                                                                                                                                                                                                                                                                                                                   |                                                                                                                                                                                                    |                                                                                                                                                                                                        |
| ... - Handling of medical devices                                                                                                                                                                                                                                                                                                                                                                                                 | Not specified                                                                                                                                                                                                                                                                                                                                                                                                                                                                                                                                                                                                                                                                   |                                                                                                                                                                                                    |                                                                                                                                                                                                        |
| ... - Waste management                                                                                                                                                                                                                                                                                                                                                                                                            | Not specified                                                                                                                                                                                                                                                                                                                                                                                                                                                                                                                                                                                                                                                                   |                                                                                                                                                                                                    |                                                                                                                                                                                                        |
| ... - Infectious critical activities (incl. MRSA, Screening, Surveillance)                                                                                                                                                                                                                                                                                                                                                        |                                                                                                                                                                                                                                                                                                                                                                                                                                                                                                                                                                                                                                                                                 | Hospital-based SNF                                                                                                                                                                                 | Free-standing SNF                                                                                                                                                                                      |
|                                                                                                                                                                                                                                                                                                                                                                                                                                   | Isolation practice                                                                                                                                                                                                                                                                                                                                                                                                                                                                                                                                                                                                                                                              | <ul style="list-style-type: none"> <li>- 14/96 (14.6%) no private room (PR)</li> <li>- 38/96 (39.6%) &lt; 3 PR</li> <li>- 44/96 (45.8%) &gt; 4 PR</li> <li>- 90.9% use PR for isolation</li> </ul> | <ul style="list-style-type: none"> <li>- 73/260 (28.1%) no private room (PR)</li> <li>- 107/260 (41.1%) &lt; 3 PR</li> <li>- 80/260 (30.8%) &gt; 4 PR</li> <li>- 74.5% use PR for isolation</li> </ul> |
|                                                                                                                                                                                                                                                                                                                                                                                                                                   | Admissions                                                                                                                                                                                                                                                                                                                                                                                                                                                                                                                                                                                                                                                                      | - do not culture new admission for MRSA (87.5%) or VRE (90.6%)                                                                                                                                     | - do not culture new admission for MRSA (90.5%) or VRE (93.4%)                                                                                                                                         |
| ... - Caring for persons (prevention and infection control)                                                                                                                                                                                                                                                                                                                                                                       |                                                                                                                                                                                                                                                                                                                                                                                                                                                                                                                                                                                                                                                                                 | Hospital-based SNF                                                                                                                                                                                 | Free-standing SNF                                                                                                                                                                                      |
|                                                                                                                                                                                                                                                                                                                                                                                                                                   | Dealing with MRSA (VRE) colonised                                                                                                                                                                                                                                                                                                                                                                                                                                                                                                                                                                                                                                               | <ul style="list-style-type: none"> <li>- 58% (73.8%) would place in PR</li> <li>- 71.2% (44.4%) would place with roommate without invasive devices</li> </ul>                                      | <ul style="list-style-type: none"> <li>- 31.9% (47.6%) would place in PR</li> <li>- 87.5% (72.8%) would place with a roommate without invasive devices</li> </ul>                                      |
|                                                                                                                                                                                                                                                                                                                                                                                                                                   | Dealing with MRSA (VRE) infected                                                                                                                                                                                                                                                                                                                                                                                                                                                                                                                                                                                                                                                | <ul style="list-style-type: none"> <li>- 82.4% (94%) would place in PR</li> <li>- 60.3% (39.4%) would place with roommate without invasive devices</li> </ul>                                      | <ul style="list-style-type: none"> <li>- ?? (71%) would place in PR</li> <li>- ?? (68.8%) would place with roommate without invasive devices</li> </ul>                                                |
| ... - Handling of medication                                                                                                                                                                                                                                                                                                                                                                                                      | Not specified                                                                                                                                                                                                                                                                                                                                                                                                                                                                                                                                                                                                                                                                   |                                                                                                                                                                                                    |                                                                                                                                                                                                        |
| ... - Laundry hygiene                                                                                                                                                                                                                                                                                                                                                                                                             | Not specified                                                                                                                                                                                                                                                                                                                                                                                                                                                                                                                                                                                                                                                                   |                                                                                                                                                                                                    |                                                                                                                                                                                                        |
| ... - Kitchen hygiene                                                                                                                                                                                                                                                                                                                                                                                                             | Not specified                                                                                                                                                                                                                                                                                                                                                                                                                                                                                                                                                                                                                                                                   |                                                                                                                                                                                                    |                                                                                                                                                                                                        |
| <b>Conclusion/Limitations</b>                                                                                                                                                                                                                                                                                                                                                                                                     |                                                                                                                                                                                                                                                                                                                                                                                                                                                                                                                                                                                                                                                                                 |                                                                                                                                                                                                    |                                                                                                                                                                                                        |
| <p><b>Conclusions:</b></p> <ul style="list-style-type: none"> <li>- SNFs are required by HCFA to have infection prevention + control programs</li> <li>- Differences between hospital-based SNF + free-standing SNF with regard to their programs for infection prevention + control</li> <li>- Very few SNFs reported performing surveillance cultures on all new admissions to detect antibiotic-resistant organisms</li> </ul> |                                                                                                                                                                                                                                                                                                                                                                                                                                                                                                                                                                                                                                                                                 |                                                                                                                                                                                                    |                                                                                                                                                                                                        |
| <b>Notes for Review:</b>                                                                                                                                                                                                                                                                                                                                                                                                          |                                                                                                                                                                                                                                                                                                                                                                                                                                                                                                                                                                                                                                                                                 |                                                                                                                                                                                                    |                                                                                                                                                                                                        |

### Appendix 3: Data Charting Sheets. Hygiene Management for Long-term Ventilated Persons in the Home Health Care Setting: A Scoping Review

- No limitations discussed!
- Article was published in 1997! → topic still relevant but importance of dealing with MDRO has changed
- Setting described is not ambulatory intensive care!
- No focus on ventilated patients

#### Abbreviations:

APIC = Infection Control and Epidemiology, Inc.

CBIC = Certification Board for Infection Control

HCFA = Health Care Financing Administration

ICP = infection control practitioner

PPE = personal protective equipment

SNF = skilled nursing facilities

VRE = vancomycin-resistant enterococcus

**Appendix 3: Data Charting Sheets.** Hygiene Management for Long-term Ventilated Persons in the Home Health Care Setting: A Scoping Review

| Data charting sheet - for health care professional, patients, relatives |                                                                                                                                                                                                                                                                                                                                                                                                                                                                                                                                                                                                                                                                                                                                                                                                                                                                                                                                                                                                                                                                                       |             |  |       |          |             |             |    |    |
|-------------------------------------------------------------------------|---------------------------------------------------------------------------------------------------------------------------------------------------------------------------------------------------------------------------------------------------------------------------------------------------------------------------------------------------------------------------------------------------------------------------------------------------------------------------------------------------------------------------------------------------------------------------------------------------------------------------------------------------------------------------------------------------------------------------------------------------------------------------------------------------------------------------------------------------------------------------------------------------------------------------------------------------------------------------------------------------------------------------------------------------------------------------------------|-------------|--|-------|----------|-------------|-------------|----|----|
| Study description                                                       |                                                                                                                                                                                                                                                                                                                                                                                                                                                                                                                                                                                                                                                                                                                                                                                                                                                                                                                                                                                                                                                                                       |             |  |       |          |             |             |    |    |
| First author                                                            | Chenoweth, Carol                                                                                                                                                                                                                                                                                                                                                                                                                                                                                                                                                                                                                                                                                                                                                                                                                                                                                                                                                                                                                                                                      |             |  |       |          |             |             |    |    |
| Title                                                                   | Ventilator-Associated Pneumonia in the Home Care Setting                                                                                                                                                                                                                                                                                                                                                                                                                                                                                                                                                                                                                                                                                                                                                                                                                                                                                                                                                                                                                              |             |  |       |          |             |             |    |    |
| Year                                                                    | 2007                                                                                                                                                                                                                                                                                                                                                                                                                                                                                                                                                                                                                                                                                                                                                                                                                                                                                                                                                                                                                                                                                  |             |  |       |          |             |             |    |    |
| Country                                                                 | USA                                                                                                                                                                                                                                                                                                                                                                                                                                                                                                                                                                                                                                                                                                                                                                                                                                                                                                                                                                                                                                                                                   |             |  |       |          |             |             |    |    |
| Study aims                                                              | Characterise VAP in HMV-patients <ul style="list-style-type: none"> <li>- Rate + incidence of VAP</li> <li>- Demographic characteristics</li> <li>- Potential risk factors for VAP</li> <li>- Outcomes of VAP in this setting</li> </ul>                                                                                                                                                                                                                                                                                                                                                                                                                                                                                                                                                                                                                                                                                                                                                                                                                                              |             |  |       |          |             |             |    |    |
| Methodology/Measures                                                    | <p><b>Study design:</b> Retrospective Cohort Study</p> <p><b>Inclusion criteria:</b></p> <ul style="list-style-type: none"> <li>- All patients who received HMV through MedEquip + were followed up by MedEquip respiratory therapists</li> <li>- Included patients represent 80% of all patients receiving HMV cared by MedEquip</li> <li>- "Cases" = study patients who developed VAP (cases were ascertained through review of home nursing + respiratory therapy records)</li> </ul> <p><b>Measures:</b></p> <p>Demographic + clinical variables were extracted from MedEquip + UHMS medical records (standardised sheet) by visiting home nurses + respiratory therapists</p> <ul style="list-style-type: none"> <li>- Respiratory status</li> <li>- Sputum</li> <li>- Oxygen requirements</li> <li>- Suctioning requirements</li> <li>- Infections</li> <li>- Outpatient antibiotic use</li> </ul> <p>→ variables were collected up to the time of onset of VAP</p> <p><b>Analysis:</b> statistical analysis (Chi<sup>2</sup>-/ Fisher exact-test, student t-test, p-value)</p> |             |  |       |          |             |             |    |    |
| Setting, Participants                                                   |                                                                                                                                                                                                                                                                                                                                                                                                                                                                                                                                                                                                                                                                                                                                                                                                                                                                                                                                                                                                                                                                                       |             |  |       |          |             |             |    |    |
| Sample size                                                             | <table border="1"> <thead> <tr> <th>total</th> <th>With VAP</th> <th>Without VAP</th> </tr> </thead> <tbody> <tr> <td>57 patients</td> <td>27</td> <td>30</td> </tr> </tbody> </table>                                                                                                                                                                                                                                                                                                                                                                                                                                                                                                                                                                                                                                                                                                                                                                                                                                                                                                |             |  | total | With VAP | Without VAP | 57 patients | 27 | 30 |
| total                                                                   | With VAP                                                                                                                                                                                                                                                                                                                                                                                                                                                                                                                                                                                                                                                                                                                                                                                                                                                                                                                                                                                                                                                                              | Without VAP |  |       |          |             |             |    |    |
| 57 patients                                                             | 27                                                                                                                                                                                                                                                                                                                                                                                                                                                                                                                                                                                                                                                                                                                                                                                                                                                                                                                                                                                                                                                                                    | 30          |  |       |          |             |             |    |    |



**Appendix 3: Data Charting Sheets.** Hygiene Management for Long-term Ventilated Persons in the Home Health Care Setting: A Scoping Review

|                                                        |                                                                                                                                                                                                                                                                                                                                                                                                                                                             |                                                                                                                                                                                                                                                                                 |                            |
|--------------------------------------------------------|-------------------------------------------------------------------------------------------------------------------------------------------------------------------------------------------------------------------------------------------------------------------------------------------------------------------------------------------------------------------------------------------------------------------------------------------------------------|---------------------------------------------------------------------------------------------------------------------------------------------------------------------------------------------------------------------------------------------------------------------------------|----------------------------|
| <b>Sex</b>                                             |                                                                                                                                                                                                                                                                                                                                                                                                                                                             | With VAP                                                                                                                                                                                                                                                                        | Without VAP                |
|                                                        | Male                                                                                                                                                                                                                                                                                                                                                                                                                                                        | 13 (48%)                                                                                                                                                                                                                                                                        | 13 (43%)                   |
| <b>Age of participation</b>                            |                                                                                                                                                                                                                                                                                                                                                                                                                                                             | With VAP                                                                                                                                                                                                                                                                        | Without VAP                |
|                                                        | Age                                                                                                                                                                                                                                                                                                                                                                                                                                                         | 19.3 (mean)                                                                                                                                                                                                                                                                     | 14.3 (mean)                |
| <b>Kind of disease</b>                                 | <p><b>VAP = ventilator-associated pneumonia</b></p> <ul style="list-style-type: none"> <li>- Predominant cause of VAP in hospitalized patients: Staph. aureus + Pseudomonas aeruginosa</li> <li>- Hospitalisation: 4-11 days (each episode costs &gt;10,000 USD)</li> <li>- Mortality in ICU: up to 40%</li> <li>- Multiple episodes of VAP separated &gt;1 month/ with different x-ray findings/ new organisms were considered as independently</li> </ul> |                                                                                                                                                                                                                                                                                 |                            |
|                                                        | <b>Study-results</b>                                                                                                                                                                                                                                                                                                                                                                                                                                        |                                                                                                                                                                                                                                                                                 |                            |
|                                                        | VAP-rates                                                                                                                                                                                                                                                                                                                                                                                                                                                   | <ul style="list-style-type: none"> <li>- 79 independent episodes in 27/57 (47%) patients</li> <li>- 1.3 VAP-episodes/ patient</li> <li>- 48 (61%) of episodes occurred within the first 500 days of ventilation</li> <li>- 1.55 VAP-infections/ 1000 ventilator-days</li> </ul> |                            |
|                                                        | Hospitalisation                                                                                                                                                                                                                                                                                                                                                                                                                                             | <ul style="list-style-type: none"> <li>- 69 (87%) of VAP</li> <li>- Mean duration: 7 +/- 9 days</li> </ul>                                                                                                                                                                      |                            |
| <b>Kind of artificial ventilation (incl. duration)</b> | Culture                                                                                                                                                                                                                                                                                                                                                                                                                                                     | <ul style="list-style-type: none"> <li>- 17 (35%) Pseudomonas</li> <li>- 11 (22%) Staphylococcus aureus</li> </ul> <p>(more detail: Tab. 1)</p>                                                                                                                                 |                            |
|                                                        |                                                                                                                                                                                                                                                                                                                                                                                                                                                             |                                                                                                                                                                                                                                                                                 |                            |
|                                                        |                                                                                                                                                                                                                                                                                                                                                                                                                                                             | With VAP                                                                                                                                                                                                                                                                        | Without VAP                |
|                                                        | Ventilator types                                                                                                                                                                                                                                                                                                                                                                                                                                            | Bilevel ventilation to tracheotomy tube, standard pressure control ventilation to tracheostomy tube, external negative-pressure, standard pressure support ( <i>more details: Tab. 2</i> )                                                                                      |                            |
|                                                        | Ventilation duration                                                                                                                                                                                                                                                                                                                                                                                                                                        | 1,012 +/-673 days                                                                                                                                                                                                                                                               | 781+/- 572 days            |
|                                                        |                                                                                                                                                                                                                                                                                                                                                                                                                                                             | <b>20/27 (74%)</b> 17-24h/d                                                                                                                                                                                                                                                     | <b>14/30 (7%)</b> 17-24h/d |
|                                                        |                                                                                                                                                                                                                                                                                                                                                                                                                                                             | <b>All 57 patients underwent a total of 50.762 days of ventilation (mean duration of ventilation: 890.6 ventilator-days/ patient)</b>                                                                                                                                           |                            |
|                                                        |                                                                                                                                                                                                                                                                                                                                                                                                                                                             |                                                                                                                                                                                                                                                                                 |                            |

**Appendix 3: Data Charting Sheets.** Hygiene Management for Long-term Ventilated Persons in the Home Health Care Setting: A Scoping Review

|                                                                                                                             |                                                                                                                                                                                                                                                                                                                                                    |
|-----------------------------------------------------------------------------------------------------------------------------|----------------------------------------------------------------------------------------------------------------------------------------------------------------------------------------------------------------------------------------------------------------------------------------------------------------------------------------------------|
|                                                                                                                             | <p><b>Indication for ventilation:</b></p> <ul style="list-style-type: none"> <li>- Congenital respiratory disease</li> <li>- Obstructive respiratory disorders</li> <li>- Nervous system disease</li> <li>- Myopathies</li> </ul>                                                                                                                  |
| <b>Family participation</b>                                                                                                 | Provide patients' primary care (if not: home nursing facilities)                                                                                                                                                                                                                                                                                   |
| <b>Concept of home-based setting/Licensed beds</b>                                                                          | <p>MedEquip Home Care Services department at the UMHS</p> <p><b>Background:</b></p> <ul style="list-style-type: none"> <li>- Respiratory services: provision of oxygen for home use, aerosol therapies, tracheostomy supplies, HMV services</li> <li>- Provided services for 12000 respiratory patients since company was found in 1995</li> </ul> |
| <b>Professions/Qualifications involved/Duration professional employment</b>                                                 | <p>Staff involved in the study:</p> <ul style="list-style-type: none"> <li>- 4 respiratory therapists (follow up)</li> <li>- 1 nurse</li> <li>- 15 technicians</li> </ul> <p>Primary care for patients:</p> <ul style="list-style-type: none"> <li>- Nursing services (if not: family members)</li> </ul>                                          |
| <b>Cooperation (e.g. Lung specialist, Weaning centre)</b>                                                                   | Not specified                                                                                                                                                                                                                                                                                                                                      |
| <b>Key Findings - Hygiene management</b>                                                                                    |                                                                                                                                                                                                                                                                                                                                                    |
| <b>Quality management for hygiene, e.g. Infection control practitioner, duration h for infection prevention and control</b> | Not specified                                                                                                                                                                                                                                                                                                                                      |
| <b>... - Training /education (incl. in- outdoor training)</b>                                                               | Not specified                                                                                                                                                                                                                                                                                                                                      |
| <b>... - Staff hygiene (incl. PPE, Hand hygiene)</b>                                                                        | Not specified                                                                                                                                                                                                                                                                                                                                      |
| <b>... - Relative/visitors (incl. Physicians/Therapists)</b>                                                                | Not specified                                                                                                                                                                                                                                                                                                                                      |
| <b>... - Cleaning and disinfection aspects</b>                                                                              | Not specified                                                                                                                                                                                                                                                                                                                                      |
| <b>... - Handling of medical devices</b>                                                                                    | Ventilator tubing was changed weekly for all patients                                                                                                                                                                                                                                                                                              |
| <b>... - Waste management</b>                                                                                               | Not specified                                                                                                                                                                                                                                                                                                                                      |
| <b>... - Infectious critical activities (incl. MRSA, Screening, Surveillance)</b>                                           | Tracheostomy suctioning (clean technique)                                                                                                                                                                                                                                                                                                          |
| <b>... - Caring for persons (prevention and infection control)</b>                                                          | Not specified                                                                                                                                                                                                                                                                                                                                      |
| <b>... - Handling of medication</b>                                                                                         | Not specified                                                                                                                                                                                                                                                                                                                                      |
| <b>... - Laundry hygiene</b>                                                                                                | Not specified                                                                                                                                                                                                                                                                                                                                      |
| <b>... - Kitchen hygiene</b>                                                                                                | Not specified                                                                                                                                                                                                                                                                                                                                      |

### Appendix 3: Data Charting Sheets. Hygiene Management for Long-term Ventilated Persons in the Home Health Care Setting: A Scoping Review

| Conclusion/Limitations                                                                                                                                                                                                                                                                                                                                                                                                                                                                                                                                                                                                                                                                                                                                                                                                                                                                                                                                                                                                                                                                                 |
|--------------------------------------------------------------------------------------------------------------------------------------------------------------------------------------------------------------------------------------------------------------------------------------------------------------------------------------------------------------------------------------------------------------------------------------------------------------------------------------------------------------------------------------------------------------------------------------------------------------------------------------------------------------------------------------------------------------------------------------------------------------------------------------------------------------------------------------------------------------------------------------------------------------------------------------------------------------------------------------------------------------------------------------------------------------------------------------------------------|
| <p><b>Conclusions:</b></p> <ul style="list-style-type: none"><li>- VAP-rates + mortality rates are much lower in HMV vs. ICU population</li><li>- VAP was likely to occur during the first 100 days of HMV (caregiver learning curve for providing ventilator care?)<br/>→ reducing risk of VAP should be focused on patients who require ventilation for longer daily durations/ who are new to receiving HMV</li><li>- No association of VAP with age, sex, underlying disease, reason for/ type of ventilation, antacid therapy, steroid use</li></ul> <p><b>Limitations:</b></p> <ul style="list-style-type: none"><li>- Cohort from a homogeneous population from a university-affiliated single home care service</li><li>- Very young patients (less comorbidities than patients in ICU)</li><li>- Only 33/ 79 (42%) VAP-episodes had culture results available</li></ul> <p><b>Notes for review:</b></p> <ul style="list-style-type: none"><li>- no hygiene management, but infection control + home treatment of VAP</li><li>- young patients (doesn't meet our inclusion criteria)</li></ul> |

#### Abbreviations:

HMV = home mechanical ventilation

ICU = intensive care unit

UMHS = University of Michigan Health System

VAP = ventilator associated pneumonia

**Appendix 3: Data Charting Sheets.** Hygiene Management for Long-term Ventilated Persons in the Home Health Care Setting: A Scoping Review

| <b>Data charting sheet - for health care professional, patients, relatives</b> |                                                                                                                                                                                                                                                                                                                                                                                                                                                                                                                                                                                                                                                                                                                                        |
|--------------------------------------------------------------------------------|----------------------------------------------------------------------------------------------------------------------------------------------------------------------------------------------------------------------------------------------------------------------------------------------------------------------------------------------------------------------------------------------------------------------------------------------------------------------------------------------------------------------------------------------------------------------------------------------------------------------------------------------------------------------------------------------------------------------------------------|
| <b>Study description</b>                                                       |                                                                                                                                                                                                                                                                                                                                                                                                                                                                                                                                                                                                                                                                                                                                        |
| <b>First author</b>                                                            | Horvath, Leila                                                                                                                                                                                                                                                                                                                                                                                                                                                                                                                                                                                                                                                                                                                         |
| <b>Title</b>                                                                   | Surveillance of Supervised Flat-Sharing Communities Requiring Intensive Home Care: Results and Conclusions                                                                                                                                                                                                                                                                                                                                                                                                                                                                                                                                                                                                                             |
| <b>Year</b>                                                                    | 2018                                                                                                                                                                                                                                                                                                                                                                                                                                                                                                                                                                                                                                                                                                                                   |
| <b>Country</b>                                                                 | Germany                                                                                                                                                                                                                                                                                                                                                                                                                                                                                                                                                                                                                                                                                                                                |
| <b>Study aims</b>                                                              | <ul style="list-style-type: none"> <li>- Overview of the type of care provided in outpatient IC-FSC in Munich</li> <li>- Review implementation of hygiene + emergency management</li> <li>- Advice + support if necessary</li> </ul>                                                                                                                                                                                                                                                                                                                                                                                                                                                                                                   |
| <b>Methodology/Measures</b>                                                    | <p><b>Study Design:</b> Observational/ descriptive study</p> <p><b>Method:</b></p> <ul style="list-style-type: none"> <li>a. <b>Structure</b> Analysis (Audit in nursing services' offices)</li> <li>b. <b>Inspection</b> of outpatient FSC (standardised checklists prepared by RGU)</li> <li>c. Final <b>discussion</b> with care services + review report (defects, complaints + recommendations)</li> </ul> <p><b>Contents of inspection:</b> Structural data, organisation, client profiles, hygiene management, handling of medical devices/ medication/ narcotics, medical care, emergency management, client safety</p> <p><b>Review period:</b> April 2015 - August 2016</p> <p><b>Data Analysis:</b> descriptive (excel)</p> |
| <b>Setting, Participants</b>                                                   |                                                                                                                                                                                                                                                                                                                                                                                                                                                                                                                                                                                                                                                                                                                                        |
| <b>Sample size</b>                                                             | <p><b>18/20</b> outpatient IC- FSC in Munich (*)</p> <ul style="list-style-type: none"> <li>- A total of 136 care places, of which 85 (62.5%) were occupied at the time of the review</li> </ul> <p>(*) exclusion criteria for 2 facilities: Renovation or new opening</p>                                                                                                                                                                                                                                                                                                                                                                                                                                                             |
| <b>Sex</b>                                                                     | Not specified                                                                                                                                                                                                                                                                                                                                                                                                                                                                                                                                                                                                                                                                                                                          |
| <b>Age of participation</b>                                                    | Not specified                                                                                                                                                                                                                                                                                                                                                                                                                                                                                                                                                                                                                                                                                                                          |
| <b>Kind of disease</b>                                                         | Not specified                                                                                                                                                                                                                                                                                                                                                                                                                                                                                                                                                                                                                                                                                                                          |
| <b>Kind of artificial ventilation (incl. duration)</b>                         | Not specified                                                                                                                                                                                                                                                                                                                                                                                                                                                                                                                                                                                                                                                                                                                          |
| <b>Family participation</b>                                                    | Not specified                                                                                                                                                                                                                                                                                                                                                                                                                                                                                                                                                                                                                                                                                                                          |
| <b>Concept of home-based setting/Licensed beds</b>                             | <b>In general:</b>                                                                                                                                                                                                                                                                                                                                                                                                                                                                                                                                                                                                                                                                                                                     |

**Appendix 3: Data Charting Sheets.** Hygiene Management for Long-term Ventilated Persons in the Home Health Care Setting: A Scoping Review

|                                                                                                                           |                                                                                                                                                                                                                                                                                                                                                                                                                                                                                                                                                                                                                                      |                                                                                                                                                                                                                                                                                                                                                                                                          |                                                                                                                                                                                                                                                                                                                                                                                                          |     |                                                                                                                  |
|---------------------------------------------------------------------------------------------------------------------------|--------------------------------------------------------------------------------------------------------------------------------------------------------------------------------------------------------------------------------------------------------------------------------------------------------------------------------------------------------------------------------------------------------------------------------------------------------------------------------------------------------------------------------------------------------------------------------------------------------------------------------------|----------------------------------------------------------------------------------------------------------------------------------------------------------------------------------------------------------------------------------------------------------------------------------------------------------------------------------------------------------------------------------------------------------|----------------------------------------------------------------------------------------------------------------------------------------------------------------------------------------------------------------------------------------------------------------------------------------------------------------------------------------------------------------------------------------------------------|-----|------------------------------------------------------------------------------------------------------------------|
|                                                                                                                           | <ul style="list-style-type: none"> <li>- Self-determined FSC</li> <li>- Max. 12 residents</li> <li>- Nursing services are freely selectable + have guest status</li> </ul> <p><b>Present study:</b></p> <ul style="list-style-type: none"> <li>- 9 nursing services took care of 20 FSC for outpatient IC in Munich</li> </ul>                                                                                                                                                                                                                                                                                                       |                                                                                                                                                                                                                                                                                                                                                                                                          |                                                                                                                                                                                                                                                                                                                                                                                                          |     |                                                                                                                  |
| <b>Professions/Qualifications involved/Duration professional employment</b>                                               | <ul style="list-style-type: none"> <li>- <b>7/9</b> Nursing specialist with further training for intensive care in a leading position</li> <li>- <b>1/9</b> Nursing service management with home respiration course</li> </ul>                                                                                                                                                                                                                                                                                                                                                                                                       |                                                                                                                                                                                                                                                                                                                                                                                                          |                                                                                                                                                                                                                                                                                                                                                                                                          |     |                                                                                                                  |
| <b>Cooperation (e.g. Lung specialist, Weaning centre)</b>                                                                 | <ul style="list-style-type: none"> <li>- <b>2/9 care provider:</b> connected to Weaning-Centre</li> <li>- <b>3/9</b> cooperation with external hygiene specialist</li> </ul>                                                                                                                                                                                                                                                                                                                                                                                                                                                         |                                                                                                                                                                                                                                                                                                                                                                                                          |                                                                                                                                                                                                                                                                                                                                                                                                          |     |                                                                                                                  |
| <b>Key Findings - Hygiene management</b>                                                                                  |                                                                                                                                                                                                                                                                                                                                                                                                                                                                                                                                                                                                                                      |                                                                                                                                                                                                                                                                                                                                                                                                          |                                                                                                                                                                                                                                                                                                                                                                                                          |     |                                                                                                                  |
| <b>Quality management for hygiene, eg Infection control practitioner, duration h for infection prevention and control</b> | <ul style="list-style-type: none"> <li>- <b>8/9 care provider:</b> hygiene representative</li> <li>- <b>18/18 FSC:</b> hygiene plans on site</li> <li>- <b>14/18</b> hygiene plans available for employees</li> <li>- <b>10/10</b> hygiene plans complete</li> <li>- <b>17/18</b> standard for endotracheal suctioning + handling of tracheal cannulas</li> </ul>                                                                                                                                                                                                                                                                    |                                                                                                                                                                                                                                                                                                                                                                                                          |                                                                                                                                                                                                                                                                                                                                                                                                          |     |                                                                                                                  |
| <b>... - Training /education (incl. in- outdoor training)</b>                                                             | <ul style="list-style-type: none"> <li>- <b>9/9 care providers:</b> proven annual hygiene training</li> <li>- <b>8/9</b> training documents in hygiene</li> </ul>                                                                                                                                                                                                                                                                                                                                                                                                                                                                    |                                                                                                                                                                                                                                                                                                                                                                                                          |                                                                                                                                                                                                                                                                                                                                                                                                          |     |                                                                                                                  |
| <b>... - Staff hygiene (incl. PPE, Hand hygiene)</b>                                                                      | <table border="1"> <tr> <td>Hand hygiene</td> <td> <ul style="list-style-type: none"> <li>- <b>18/18 FSC:</b> VAH-listed hand disinfectants + wall-mounted hand disinfectant dispensers in client rooms</li> <li>- <b>14/18</b> correct hand hygiene (<b>4/18</b> complaints: jewellery, watches, painted nails)</li> <li>- <b>15/18</b> Hand disinfectant dispensers in rooms in which reprocessing of tracheal cannulas + suction is performed</li> </ul> </td> </tr> <tr> <td>PPE</td> <td> <ul style="list-style-type: none"> <li>- <b>18/18</b> wearing PPE</li> <li>- <b>18/18</b> keeping PPE</li> </ul> </td> </tr> </table> | Hand hygiene                                                                                                                                                                                                                                                                                                                                                                                             | <ul style="list-style-type: none"> <li>- <b>18/18 FSC:</b> VAH-listed hand disinfectants + wall-mounted hand disinfectant dispensers in client rooms</li> <li>- <b>14/18</b> correct hand hygiene (<b>4/18</b> complaints: jewellery, watches, painted nails)</li> <li>- <b>15/18</b> Hand disinfectant dispensers in rooms in which reprocessing of tracheal cannulas + suction is performed</li> </ul> | PPE | <ul style="list-style-type: none"> <li>- <b>18/18</b> wearing PPE</li> <li>- <b>18/18</b> keeping PPE</li> </ul> |
|                                                                                                                           | Hand hygiene                                                                                                                                                                                                                                                                                                                                                                                                                                                                                                                                                                                                                         | <ul style="list-style-type: none"> <li>- <b>18/18 FSC:</b> VAH-listed hand disinfectants + wall-mounted hand disinfectant dispensers in client rooms</li> <li>- <b>14/18</b> correct hand hygiene (<b>4/18</b> complaints: jewellery, watches, painted nails)</li> <li>- <b>15/18</b> Hand disinfectant dispensers in rooms in which reprocessing of tracheal cannulas + suction is performed</li> </ul> |                                                                                                                                                                                                                                                                                                                                                                                                          |     |                                                                                                                  |
| PPE                                                                                                                       | <ul style="list-style-type: none"> <li>- <b>18/18</b> wearing PPE</li> <li>- <b>18/18</b> keeping PPE</li> </ul>                                                                                                                                                                                                                                                                                                                                                                                                                                                                                                                     |                                                                                                                                                                                                                                                                                                                                                                                                          |                                                                                                                                                                                                                                                                                                                                                                                                          |     |                                                                                                                  |
| <b>... - Relative/visitors (incl. Physicians/Therapists)</b>                                                              | Not specified                                                                                                                                                                                                                                                                                                                                                                                                                                                                                                                                                                                                                        |                                                                                                                                                                                                                                                                                                                                                                                                          |                                                                                                                                                                                                                                                                                                                                                                                                          |     |                                                                                                                  |
| <b>... - Cleaning and disinfection aspects</b>                                                                            | <ul style="list-style-type: none"> <li>- <b>18/18 FSC:</b> VAH-listed surface disinfectants (<b>8/18</b> correct dosage)</li> <li>- <b>7/18</b> VAH-listed fast disinfectant</li> <li>- <b>1/18</b> exclusively alcoholic products for surface disinfection</li> <li>- <b>8/18</b> tissue dispenser systems (handling correct in <b>2/8</b>)</li> </ul>                                                                                                                                                                                                                                                                              |                                                                                                                                                                                                                                                                                                                                                                                                          |                                                                                                                                                                                                                                                                                                                                                                                                          |     |                                                                                                                  |
| <b>... - Handling of medical devices</b>                                                                                  | <ul style="list-style-type: none"> <li>- <b>4/18 FSC:</b> proper preparation of the tracheal cannulae</li> <li>- <b>18/18</b> tube + filter change interval according to manufacturer's instructions</li> </ul>                                                                                                                                                                                                                                                                                                                                                                                                                      |                                                                                                                                                                                                                                                                                                                                                                                                          |                                                                                                                                                                                                                                                                                                                                                                                                          |     |                                                                                                                  |

**Appendix 3: Data Charting Sheets.** Hygiene Management for Long-term Ventilated Persons in the Home Health Care Setting: A Scoping Review

|                                                                                                                                                                                                                                                                                                                                                                                                                                                                                                                                                                                                                                                                                                                                                                                                                                                                                                                                                                                                                                                                                                                                                                                                                                                                                                                                                                                                        |                                                                                                                                                                                                                                                                                                                                  |
|--------------------------------------------------------------------------------------------------------------------------------------------------------------------------------------------------------------------------------------------------------------------------------------------------------------------------------------------------------------------------------------------------------------------------------------------------------------------------------------------------------------------------------------------------------------------------------------------------------------------------------------------------------------------------------------------------------------------------------------------------------------------------------------------------------------------------------------------------------------------------------------------------------------------------------------------------------------------------------------------------------------------------------------------------------------------------------------------------------------------------------------------------------------------------------------------------------------------------------------------------------------------------------------------------------------------------------------------------------------------------------------------------------|----------------------------------------------------------------------------------------------------------------------------------------------------------------------------------------------------------------------------------------------------------------------------------------------------------------------------------|
|                                                                                                                                                                                                                                                                                                                                                                                                                                                                                                                                                                                                                                                                                                                                                                                                                                                                                                                                                                                                                                                                                                                                                                                                                                                                                                                                                                                                        | - <b>14/18</b> daily functional test of all active medical devices                                                                                                                                                                                                                                                               |
| ... - Waste management                                                                                                                                                                                                                                                                                                                                                                                                                                                                                                                                                                                                                                                                                                                                                                                                                                                                                                                                                                                                                                                                                                                                                                                                                                                                                                                                                                                 | Not specified                                                                                                                                                                                                                                                                                                                    |
| ... - Infectious critical activities (incl. MRSA, Screening, Surveillance)                                                                                                                                                                                                                                                                                                                                                                                                                                                                                                                                                                                                                                                                                                                                                                                                                                                                                                                                                                                                                                                                                                                                                                                                                                                                                                                             | Not specified                                                                                                                                                                                                                                                                                                                    |
| ... - Caring for persons (prevention and infection control)                                                                                                                                                                                                                                                                                                                                                                                                                                                                                                                                                                                                                                                                                                                                                                                                                                                                                                                                                                                                                                                                                                                                                                                                                                                                                                                                            | - <b>14/18</b> FSC standard to MRSA<br>- <b>11/18</b> standard to MRGN<br>- <b>13/18</b> standard to Norovirus                                                                                                                                                                                                                   |
| ... - Handling of medication                                                                                                                                                                                                                                                                                                                                                                                                                                                                                                                                                                                                                                                                                                                                                                                                                                                                                                                                                                                                                                                                                                                                                                                                                                                                                                                                                                           | Not specified                                                                                                                                                                                                                                                                                                                    |
| ... - Laundry hygiene                                                                                                                                                                                                                                                                                                                                                                                                                                                                                                                                                                                                                                                                                                                                                                                                                                                                                                                                                                                                                                                                                                                                                                                                                                                                                                                                                                                  | - <b>18/18</b> FSC: own laundry<br>- <b>13/18</b> industrial washing machines<br>- <b>18/18</b> disinfectant detergent<br>- <b>9/18</b> work instructions for laundry preparation<br>- <b>16/18</b> disinfecting treatment + storage of work clothes<br>- <b>9/18</b> improper preparation, drying, storage of cleaning utensils |
| ... - Kitchen hygiene                                                                                                                                                                                                                                                                                                                                                                                                                                                                                                                                                                                                                                                                                                                                                                                                                                                                                                                                                                                                                                                                                                                                                                                                                                                                                                                                                                                  | Not specified                                                                                                                                                                                                                                                                                                                    |
| <b>Conclusion/Limitations</b>                                                                                                                                                                                                                                                                                                                                                                                                                                                                                                                                                                                                                                                                                                                                                                                                                                                                                                                                                                                                                                                                                                                                                                                                                                                                                                                                                                          |                                                                                                                                                                                                                                                                                                                                  |
| <p><b>Conclusions in general:</b> regular consultations, continuing education + hygiene inspections by public health department have positive effects on hygiene + emergency management</p> <p><b>Personal qualification:</b> Professional background + continuing education of nurses very different</p> <p><b>Hygiene Management</b></p> <ul style="list-style-type: none"> <li>- All care providers had hygiene representatives, but certificates of qualification with different information on scope + duration of the courses</li> <li>- None of the hygiene representatives had a qualification according to the DGKH guidelines</li> <li>- Hygiene plans: standards on MRE, MRSA, MDRO were partially missing</li> <li>- Hand hygiene: well implemented</li> <li>- Laundry preparation: need for advice; use of small industrial washing machines recommended</li> <li>- Complaints in handling PPE, reprocessing of tracheal cannulae, respiratory/aspiration accessories + when handling surface disinfectants</li> </ul> <p>→ good test result regarding organisational structures + hygienic equipment</p> <p>→ So far, there are no binding regulations on the form of care in FSC, even if they are an integral part of outpatient medical care</p> <p><b>Notes for review:</b></p> <ul style="list-style-type: none"> <li>- Setting <b>FSC</b> applies to our research topic</li> </ul> |                                                                                                                                                                                                                                                                                                                                  |

### **Appendix 3: Data Charting Sheets.** Hygiene Management for Long-term Ventilated Persons in the Home Health Care Setting: A Scoping Review

- Limited data (only Munich)
- No limitations discussed by authors
- Consider new IPEG

#### **Abbreviations:**

DGKH = Deutsche Gesellschaft für Krankenhaushygiene

IC = intensive care

RGU = Referat für Gesundheit + Umwelt

VAH = Verbund für Angewandte Hygiene e.V.

**Appendix 3: Data Charting Sheets.** Hygiene Management for Long-term Ventilated Persons in the Home Health Care Setting: A Scoping Review

| Data charting sheet - for health care professional, patients, relatives |                                                                                                                                                                                                                                                                                                                                                                                                                                                                                                                                                                                                                                                                                                                                                                                                                                                                                                                                                                                                                                                                                                                                                                                                                                                                                                                                                                                                                                                                                                                                                                               |                                                                                                                                                                                                                     |                  |  |  |   |                 |                                                                                                                                                                                                                     |
|-------------------------------------------------------------------------|-------------------------------------------------------------------------------------------------------------------------------------------------------------------------------------------------------------------------------------------------------------------------------------------------------------------------------------------------------------------------------------------------------------------------------------------------------------------------------------------------------------------------------------------------------------------------------------------------------------------------------------------------------------------------------------------------------------------------------------------------------------------------------------------------------------------------------------------------------------------------------------------------------------------------------------------------------------------------------------------------------------------------------------------------------------------------------------------------------------------------------------------------------------------------------------------------------------------------------------------------------------------------------------------------------------------------------------------------------------------------------------------------------------------------------------------------------------------------------------------------------------------------------------------------------------------------------|---------------------------------------------------------------------------------------------------------------------------------------------------------------------------------------------------------------------|------------------|--|--|---|-----------------|---------------------------------------------------------------------------------------------------------------------------------------------------------------------------------------------------------------------|
| Study description                                                       |                                                                                                                                                                                                                                                                                                                                                                                                                                                                                                                                                                                                                                                                                                                                                                                                                                                                                                                                                                                                                                                                                                                                                                                                                                                                                                                                                                                                                                                                                                                                                                               |                                                                                                                                                                                                                     |                  |  |  |   |                 |                                                                                                                                                                                                                     |
| <b>First author</b>                                                     | Leonhard, Matthias                                                                                                                                                                                                                                                                                                                                                                                                                                                                                                                                                                                                                                                                                                                                                                                                                                                                                                                                                                                                                                                                                                                                                                                                                                                                                                                                                                                                                                                                                                                                                            |                                                                                                                                                                                                                     |                  |  |  |   |                 |                                                                                                                                                                                                                     |
| <b>Title</b>                                                            | Microbiological evaluation of different reprocessing methods for cuffed and un-cuffed tracheostomy tubes in home-care and hospital setting                                                                                                                                                                                                                                                                                                                                                                                                                                                                                                                                                                                                                                                                                                                                                                                                                                                                                                                                                                                                                                                                                                                                                                                                                                                                                                                                                                                                                                    |                                                                                                                                                                                                                     |                  |  |  |   |                 |                                                                                                                                                                                                                     |
| <b>Year</b>                                                             | 2016                                                                                                                                                                                                                                                                                                                                                                                                                                                                                                                                                                                                                                                                                                                                                                                                                                                                                                                                                                                                                                                                                                                                                                                                                                                                                                                                                                                                                                                                                                                                                                          |                                                                                                                                                                                                                     |                  |  |  |   |                 |                                                                                                                                                                                                                     |
| <b>Country</b>                                                          | Austria/ Great Britain (remains unclear)                                                                                                                                                                                                                                                                                                                                                                                                                                                                                                                                                                                                                                                                                                                                                                                                                                                                                                                                                                                                                                                                                                                                                                                                                                                                                                                                                                                                                                                                                                                                      |                                                                                                                                                                                                                     |                  |  |  |   |                 |                                                                                                                                                                                                                     |
| <b>Study aims</b>                                                       | <ul style="list-style-type: none"> <li>- To evaluate different reprocessing methods</li> <li>- To determine mechanical integrity + functionality of tracheostomy tubes following reprocessing</li> </ul>                                                                                                                                                                                                                                                                                                                                                                                                                                                                                                                                                                                                                                                                                                                                                                                                                                                                                                                                                                                                                                                                                                                                                                                                                                                                                                                                                                      |                                                                                                                                                                                                                     |                  |  |  |   |                 |                                                                                                                                                                                                                     |
| <b>Methodology/Measures</b>                                             | <p><b>Study design:</b> Experimental study (randomised)</p> <p><b>Method:</b><br/>Examination of un-cuffed + cuffed tubes:</p> <ul style="list-style-type: none"> <li>- Un-cuffed tubes were changed + collected after minimum of 1 day of use</li> <li>- Cuffed tubes were changed + collected after minimum of 3 days of use</li> </ul> <p><b>1. Microbiological assessment</b></p> <ul style="list-style-type: none"> <li>- Microbial concentration on the inner surface of the tubes was assessed BEFORE + AFTER manual cleaning: <ul style="list-style-type: none"> <li>• Procedure method A + D: Tube's lumen was rinsed with 10mL of sterile 0.9% saline solution</li> <li>• Procedure method B + C: Tube's lumen was rinsed with validated neutralizers</li> </ul> </li> <li>- Microbial concentration of rinsing solution was determined by using the standard microbiological serial dilution method + planting on different cultures</li> </ul> <p><b>2. Tubes were assigned to 3 additional (!) cleaning procedures randomly</b></p> <table border="1" style="width: 100%; border-collapse: collapse;"> <thead> <tr> <th colspan="3">Cleaning Methods</th> </tr> </thead> <tbody> <tr> <td style="text-align: center; width: 10%;">A</td> <td style="width: 50%;">Manual cleaning</td> <td style="width: 40%;"> <ul style="list-style-type: none"> <li>- Brushing with a new tube brush (available from tube manufacturers)</li> <li>- Rinsing with tap-water</li> <li>- Until macroscopically clean result was achieved</li> </ul> </td> </tr> </tbody> </table> |                                                                                                                                                                                                                     | Cleaning Methods |  |  | A | Manual cleaning | <ul style="list-style-type: none"> <li>- Brushing with a new tube brush (available from tube manufacturers)</li> <li>- Rinsing with tap-water</li> <li>- Until macroscopically clean result was achieved</li> </ul> |
| Cleaning Methods                                                        |                                                                                                                                                                                                                                                                                                                                                                                                                                                                                                                                                                                                                                                                                                                                                                                                                                                                                                                                                                                                                                                                                                                                                                                                                                                                                                                                                                                                                                                                                                                                                                               |                                                                                                                                                                                                                     |                  |  |  |   |                 |                                                                                                                                                                                                                     |
| A                                                                       | Manual cleaning                                                                                                                                                                                                                                                                                                                                                                                                                                                                                                                                                                                                                                                                                                                                                                                                                                                                                                                                                                                                                                                                                                                                                                                                                                                                                                                                                                                                                                                                                                                                                               | <ul style="list-style-type: none"> <li>- Brushing with a new tube brush (available from tube manufacturers)</li> <li>- Rinsing with tap-water</li> <li>- Until macroscopically clean result was achieved</li> </ul> |                  |  |  |   |                 |                                                                                                                                                                                                                     |



**Appendix 3: Data Charting Sheets.** Hygiene Management for Long-term Ventilated Persons in the Home Health Care Setting: A Scoping Review

|                                                                                                                              |                                                                                                                                                                                                                                                                                                                                                                                                                                                                                                                                                                                                                                                                                                                                                                                                                                                                                                                                      |                                                                                                                                                                                                                                                       |                                             |                                                                                                                                                                                                                                                       |                                                             |                                                                        |                                                                                                                                                                                                   |   |                                               |                                                                                                                                                   |
|------------------------------------------------------------------------------------------------------------------------------|--------------------------------------------------------------------------------------------------------------------------------------------------------------------------------------------------------------------------------------------------------------------------------------------------------------------------------------------------------------------------------------------------------------------------------------------------------------------------------------------------------------------------------------------------------------------------------------------------------------------------------------------------------------------------------------------------------------------------------------------------------------------------------------------------------------------------------------------------------------------------------------------------------------------------------------|-------------------------------------------------------------------------------------------------------------------------------------------------------------------------------------------------------------------------------------------------------|---------------------------------------------|-------------------------------------------------------------------------------------------------------------------------------------------------------------------------------------------------------------------------------------------------------|-------------------------------------------------------------|------------------------------------------------------------------------|---------------------------------------------------------------------------------------------------------------------------------------------------------------------------------------------------|---|-----------------------------------------------|---------------------------------------------------------------------------------------------------------------------------------------------------|
|                                                                                                                              | <table border="1"> <tr> <td>B</td> <td>Manual pre-cleaning + chemical disinfection</td> <td> <ul style="list-style-type: none"> <li>- Complete submersion of the cleansed tubes in a commercially available + by manufacturer recommended disinfection solution</li> <li>- For 1h at room temperature</li> <li>- Rinsing with tap-water</li> </ul> </td> </tr> <tr> <td>C</td> <td>Manual pre-cleaning + machine-based thermal disinfection in dishwasher</td> <td> <ul style="list-style-type: none"> <li>- Tubes were placed vertically in dishwasher</li> <li>- Peak process temp. 65°, standard washing program (48min), no additional cleaning agents</li> </ul> </td> </tr> <tr> <td>D</td> <td>Manual pre-cleaning + ultrasound sonification</td> <td> <ul style="list-style-type: none"> <li>- US-cleaning in a commercially available US-household device</li> <li>- Rinsing with tap-water</li> </ul> </td> </tr> </table> | B                                                                                                                                                                                                                                                     | Manual pre-cleaning + chemical disinfection | <ul style="list-style-type: none"> <li>- Complete submersion of the cleansed tubes in a commercially available + by manufacturer recommended disinfection solution</li> <li>- For 1h at room temperature</li> <li>- Rinsing with tap-water</li> </ul> | C                                                           | Manual pre-cleaning + machine-based thermal disinfection in dishwasher | <ul style="list-style-type: none"> <li>- Tubes were placed vertically in dishwasher</li> <li>- Peak process temp. 65°, standard washing program (48min), no additional cleaning agents</li> </ul> | D | Manual pre-cleaning + ultrasound sonification | <ul style="list-style-type: none"> <li>- US-cleaning in a commercially available US-household device</li> <li>- Rinsing with tap-water</li> </ul> |
| B                                                                                                                            | Manual pre-cleaning + chemical disinfection                                                                                                                                                                                                                                                                                                                                                                                                                                                                                                                                                                                                                                                                                                                                                                                                                                                                                          | <ul style="list-style-type: none"> <li>- Complete submersion of the cleansed tubes in a commercially available + by manufacturer recommended disinfection solution</li> <li>- For 1h at room temperature</li> <li>- Rinsing with tap-water</li> </ul> |                                             |                                                                                                                                                                                                                                                       |                                                             |                                                                        |                                                                                                                                                                                                   |   |                                               |                                                                                                                                                   |
| C                                                                                                                            | Manual pre-cleaning + machine-based thermal disinfection in dishwasher                                                                                                                                                                                                                                                                                                                                                                                                                                                                                                                                                                                                                                                                                                                                                                                                                                                               | <ul style="list-style-type: none"> <li>- Tubes were placed vertically in dishwasher</li> <li>- Peak process temp. 65°, standard washing program (48min), no additional cleaning agents</li> </ul>                                                     |                                             |                                                                                                                                                                                                                                                       |                                                             |                                                                        |                                                                                                                                                                                                   |   |                                               |                                                                                                                                                   |
| D                                                                                                                            | Manual pre-cleaning + ultrasound sonification                                                                                                                                                                                                                                                                                                                                                                                                                                                                                                                                                                                                                                                                                                                                                                                                                                                                                        | <ul style="list-style-type: none"> <li>- US-cleaning in a commercially available US-household device</li> <li>- Rinsing with tap-water</li> </ul>                                                                                                     |                                             |                                                                                                                                                                                                                                                       |                                                             |                                                                        |                                                                                                                                                                                                   |   |                                               |                                                                                                                                                   |
|                                                                                                                              | <p><b>3. Evaluating material integrity</b></p> <ul style="list-style-type: none"> <li>- Cleaned + reprocessed tracheostomy tubes were examined for visible signs of material alteration including colour changes, deformation or other causes for loss of tube-function</li> <li>- Cuff integrity was tested by inflation at 25mmHg of air + documentation of the maintenance of pressure during 20min with a cuff pressure manometer</li> </ul>                                                                                                                                                                                                                                                                                                                                                                                                                                                                                     |                                                                                                                                                                                                                                                       |                                             |                                                                                                                                                                                                                                                       |                                                             |                                                                        |                                                                                                                                                                                                   |   |                                               |                                                                                                                                                   |
| <b>Setting, Participants</b>                                                                                                 |                                                                                                                                                                                                                                                                                                                                                                                                                                                                                                                                                                                                                                                                                                                                                                                                                                                                                                                                      |                                                                                                                                                                                                                                                       |                                             |                                                                                                                                                                                                                                                       |                                                             |                                                                        |                                                                                                                                                                                                   |   |                                               |                                                                                                                                                   |
| <b>Sample size</b>                                                                                                           | 16 polymer tracheostomy tubes (8 cuffed + 8 un-cuffed) from hospital in-patients                                                                                                                                                                                                                                                                                                                                                                                                                                                                                                                                                                                                                                                                                                                                                                                                                                                     |                                                                                                                                                                                                                                                       |                                             |                                                                                                                                                                                                                                                       |                                                             |                                                                        |                                                                                                                                                                                                   |   |                                               |                                                                                                                                                   |
| <b>Sex</b>                                                                                                                   | Not specified                                                                                                                                                                                                                                                                                                                                                                                                                                                                                                                                                                                                                                                                                                                                                                                                                                                                                                                        |                                                                                                                                                                                                                                                       |                                             |                                                                                                                                                                                                                                                       |                                                             |                                                                        |                                                                                                                                                                                                   |   |                                               |                                                                                                                                                   |
| <b>Age of participation</b>                                                                                                  | Not specified                                                                                                                                                                                                                                                                                                                                                                                                                                                                                                                                                                                                                                                                                                                                                                                                                                                                                                                        |                                                                                                                                                                                                                                                       |                                             |                                                                                                                                                                                                                                                       |                                                             |                                                                        |                                                                                                                                                                                                   |   |                                               |                                                                                                                                                   |
| <b>Kind of disease</b>                                                                                                       | Not specified                                                                                                                                                                                                                                                                                                                                                                                                                                                                                                                                                                                                                                                                                                                                                                                                                                                                                                                        |                                                                                                                                                                                                                                                       |                                             |                                                                                                                                                                                                                                                       |                                                             |                                                                        |                                                                                                                                                                                                   |   |                                               |                                                                                                                                                   |
| <b>Kind of artificial ventilation (incl. duration)</b>                                                                       | Not specified                                                                                                                                                                                                                                                                                                                                                                                                                                                                                                                                                                                                                                                                                                                                                                                                                                                                                                                        |                                                                                                                                                                                                                                                       |                                             |                                                                                                                                                                                                                                                       |                                                             |                                                                        |                                                                                                                                                                                                   |   |                                               |                                                                                                                                                   |
| <b>Family participation</b>                                                                                                  | Not specified                                                                                                                                                                                                                                                                                                                                                                                                                                                                                                                                                                                                                                                                                                                                                                                                                                                                                                                        |                                                                                                                                                                                                                                                       |                                             |                                                                                                                                                                                                                                                       |                                                             |                                                                        |                                                                                                                                                                                                   |   |                                               |                                                                                                                                                   |
| <b>Concept of home-based setting/Licensed beds</b>                                                                           | Not specified                                                                                                                                                                                                                                                                                                                                                                                                                                                                                                                                                                                                                                                                                                                                                                                                                                                                                                                        |                                                                                                                                                                                                                                                       |                                             |                                                                                                                                                                                                                                                       |                                                             |                                                                        |                                                                                                                                                                                                   |   |                                               |                                                                                                                                                   |
| <b>Professions/Qualifications involved/Duration professional employment</b>                                                  | Not specified                                                                                                                                                                                                                                                                                                                                                                                                                                                                                                                                                                                                                                                                                                                                                                                                                                                                                                                        |                                                                                                                                                                                                                                                       |                                             |                                                                                                                                                                                                                                                       |                                                             |                                                                        |                                                                                                                                                                                                   |   |                                               |                                                                                                                                                   |
| <b>Cooperation (e. g. Lung specialist, Weaning centre)</b>                                                                   | Not specified                                                                                                                                                                                                                                                                                                                                                                                                                                                                                                                                                                                                                                                                                                                                                                                                                                                                                                                        |                                                                                                                                                                                                                                                       |                                             |                                                                                                                                                                                                                                                       |                                                             |                                                                        |                                                                                                                                                                                                   |   |                                               |                                                                                                                                                   |
| <b>Key Findings - Hygiene management</b>                                                                                     |                                                                                                                                                                                                                                                                                                                                                                                                                                                                                                                                                                                                                                                                                                                                                                                                                                                                                                                                      |                                                                                                                                                                                                                                                       |                                             |                                                                                                                                                                                                                                                       |                                                             |                                                                        |                                                                                                                                                                                                   |   |                                               |                                                                                                                                                   |
| <b>Quality management for hygiene, e. g. Infection control practitioner, duration h for infection prevention and control</b> | Not specified                                                                                                                                                                                                                                                                                                                                                                                                                                                                                                                                                                                                                                                                                                                                                                                                                                                                                                                        |                                                                                                                                                                                                                                                       |                                             |                                                                                                                                                                                                                                                       |                                                             |                                                                        |                                                                                                                                                                                                   |   |                                               |                                                                                                                                                   |
| <b>... - Training /education (incl. in- outdoor training)</b>                                                                | Not specified                                                                                                                                                                                                                                                                                                                                                                                                                                                                                                                                                                                                                                                                                                                                                                                                                                                                                                                        |                                                                                                                                                                                                                                                       |                                             |                                                                                                                                                                                                                                                       |                                                             |                                                                        |                                                                                                                                                                                                   |   |                                               |                                                                                                                                                   |
| <b>... - Staff hygiene (incl. PPE, Hand hygiene)</b>                                                                         | Not specified                                                                                                                                                                                                                                                                                                                                                                                                                                                                                                                                                                                                                                                                                                                                                                                                                                                                                                                        |                                                                                                                                                                                                                                                       |                                             |                                                                                                                                                                                                                                                       |                                                             |                                                                        |                                                                                                                                                                                                   |   |                                               |                                                                                                                                                   |
| <b>... - Relative/visitors (incl. Physicians/Therapists)</b>                                                                 | Not specified                                                                                                                                                                                                                                                                                                                                                                                                                                                                                                                                                                                                                                                                                                                                                                                                                                                                                                                        |                                                                                                                                                                                                                                                       |                                             |                                                                                                                                                                                                                                                       |                                                             |                                                                        |                                                                                                                                                                                                   |   |                                               |                                                                                                                                                   |
| <b>... - Cleaning and disinfection aspects</b>                                                                               | <table border="1"> <tr> <td colspan="2"><b>Cleaning Methods</b></td> </tr> <tr> <td>A</td> <td>microbial reduction, but poor reliability + reproducibility</td> </tr> </table>                                                                                                                                                                                                                                                                                                                                                                                                                                                                                                                                                                                                                                                                                                                                                       | <b>Cleaning Methods</b>                                                                                                                                                                                                                               |                                             | A                                                                                                                                                                                                                                                     | microbial reduction, but poor reliability + reproducibility |                                                                        |                                                                                                                                                                                                   |   |                                               |                                                                                                                                                   |
| <b>Cleaning Methods</b>                                                                                                      |                                                                                                                                                                                                                                                                                                                                                                                                                                                                                                                                                                                                                                                                                                                                                                                                                                                                                                                                      |                                                                                                                                                                                                                                                       |                                             |                                                                                                                                                                                                                                                       |                                                             |                                                                        |                                                                                                                                                                                                   |   |                                               |                                                                                                                                                   |
| A                                                                                                                            | microbial reduction, but poor reliability + reproducibility                                                                                                                                                                                                                                                                                                                                                                                                                                                                                                                                                                                                                                                                                                                                                                                                                                                                          |                                                                                                                                                                                                                                                       |                                             |                                                                                                                                                                                                                                                       |                                                             |                                                                        |                                                                                                                                                                                                   |   |                                               |                                                                                                                                                   |

**Appendix 3: Data Charting Sheets.** Hygiene Management for Long-term Ventilated Persons in the Home Health Care Setting: A Scoping Review

|                                                                                                                                                                                                                                                                                                                                                                                                                                                                                                                                                                                                                                                                                                                                                                                                                                                                                                                                                                                                                                                                                                                               |                                                                                                                                                                                                                                                                                                                |   |                                                      |   |                                                                                   |   |                                                |
|-------------------------------------------------------------------------------------------------------------------------------------------------------------------------------------------------------------------------------------------------------------------------------------------------------------------------------------------------------------------------------------------------------------------------------------------------------------------------------------------------------------------------------------------------------------------------------------------------------------------------------------------------------------------------------------------------------------------------------------------------------------------------------------------------------------------------------------------------------------------------------------------------------------------------------------------------------------------------------------------------------------------------------------------------------------------------------------------------------------------------------|----------------------------------------------------------------------------------------------------------------------------------------------------------------------------------------------------------------------------------------------------------------------------------------------------------------|---|------------------------------------------------------|---|-----------------------------------------------------------------------------------|---|------------------------------------------------|
|                                                                                                                                                                                                                                                                                                                                                                                                                                                                                                                                                                                                                                                                                                                                                                                                                                                                                                                                                                                                                                                                                                                               | <table border="1"> <tr> <td>B</td> <td>complete microbial elimination in all tested samples</td> </tr> <tr> <td>C</td> <td>reduced microbial burden, if secure fixation in a vertical position in dishwasher</td> </tr> <tr> <td>D</td> <td>did not improve results of manual pre-cleaning</td> </tr> </table> | B | complete microbial elimination in all tested samples | C | reduced microbial burden, if secure fixation in a vertical position in dishwasher | D | did not improve results of manual pre-cleaning |
| B                                                                                                                                                                                                                                                                                                                                                                                                                                                                                                                                                                                                                                                                                                                                                                                                                                                                                                                                                                                                                                                                                                                             | complete microbial elimination in all tested samples                                                                                                                                                                                                                                                           |   |                                                      |   |                                                                                   |   |                                                |
| C                                                                                                                                                                                                                                                                                                                                                                                                                                                                                                                                                                                                                                                                                                                                                                                                                                                                                                                                                                                                                                                                                                                             | reduced microbial burden, if secure fixation in a vertical position in dishwasher                                                                                                                                                                                                                              |   |                                                      |   |                                                                                   |   |                                                |
| D                                                                                                                                                                                                                                                                                                                                                                                                                                                                                                                                                                                                                                                                                                                                                                                                                                                                                                                                                                                                                                                                                                                             | did not improve results of manual pre-cleaning                                                                                                                                                                                                                                                                 |   |                                                      |   |                                                                                   |   |                                                |
|                                                                                                                                                                                                                                                                                                                                                                                                                                                                                                                                                                                                                                                                                                                                                                                                                                                                                                                                                                                                                                                                                                                               | <i>(more details: s. Tab. 2)</i>                                                                                                                                                                                                                                                                               |   |                                                      |   |                                                                                   |   |                                                |
| ... - Handling of medical devices                                                                                                                                                                                                                                                                                                                                                                                                                                                                                                                                                                                                                                                                                                                                                                                                                                                                                                                                                                                                                                                                                             | <i>s. cleaning and disinfection aspects</i>                                                                                                                                                                                                                                                                    |   |                                                      |   |                                                                                   |   |                                                |
| ... - Waste management                                                                                                                                                                                                                                                                                                                                                                                                                                                                                                                                                                                                                                                                                                                                                                                                                                                                                                                                                                                                                                                                                                        | Not specified                                                                                                                                                                                                                                                                                                  |   |                                                      |   |                                                                                   |   |                                                |
| ... - Infectious critical activities (incl. MRSA, Screening, Surveillance)                                                                                                                                                                                                                                                                                                                                                                                                                                                                                                                                                                                                                                                                                                                                                                                                                                                                                                                                                                                                                                                    | Not specified                                                                                                                                                                                                                                                                                                  |   |                                                      |   |                                                                                   |   |                                                |
| ... - Caring for persons (prevention and infection control)                                                                                                                                                                                                                                                                                                                                                                                                                                                                                                                                                                                                                                                                                                                                                                                                                                                                                                                                                                                                                                                                   | Not specified                                                                                                                                                                                                                                                                                                  |   |                                                      |   |                                                                                   |   |                                                |
| ... - Handling of medication                                                                                                                                                                                                                                                                                                                                                                                                                                                                                                                                                                                                                                                                                                                                                                                                                                                                                                                                                                                                                                                                                                  | Not specified                                                                                                                                                                                                                                                                                                  |   |                                                      |   |                                                                                   |   |                                                |
| ... - Laundry hygiene                                                                                                                                                                                                                                                                                                                                                                                                                                                                                                                                                                                                                                                                                                                                                                                                                                                                                                                                                                                                                                                                                                         | Not specified                                                                                                                                                                                                                                                                                                  |   |                                                      |   |                                                                                   |   |                                                |
| ... - Kitchen hygiene                                                                                                                                                                                                                                                                                                                                                                                                                                                                                                                                                                                                                                                                                                                                                                                                                                                                                                                                                                                                                                                                                                         | Not specified                                                                                                                                                                                                                                                                                                  |   |                                                      |   |                                                                                   |   |                                                |
| <b>Conclusion/Limitations</b>                                                                                                                                                                                                                                                                                                                                                                                                                                                                                                                                                                                                                                                                                                                                                                                                                                                                                                                                                                                                                                                                                                 |                                                                                                                                                                                                                                                                                                                |   |                                                      |   |                                                                                   |   |                                                |
| <p><b>Conclusion:</b></p> <ul style="list-style-type: none"> <li>- No standardized cleaning procedures or management policies on use + reuse of tracheostomy tubes exist</li> <li>- Inner lumen of tracheostomy tubes is colonised by Staph. aureus, Staph. epidermis, Pseudomonas aeruginosa + Candida spp. most frequently</li> <li>- Recommendation: manual cleaning + chemical or thermal disinfection (dishwasher seems to be optimal method for regular cleansing + disinfecting tracheostomy tubes, if tubes are placed in secure fixation)</li> <li>- No signs of material alteration</li> <li>- Cuff functionality after the single reprocessing regiments remained intact in all but one cuffed tubes</li> </ul> <p><b>Limitations:</b></p> <ul style="list-style-type: none"> <li>- No investigation on microbial reduction which can be achieved by using a dishwasher alone</li> <li>- Only one single reprocessing step</li> </ul> <p><b>Notes for review:</b></p> <ul style="list-style-type: none"> <li>- Some aspects remain unclear (e.g. setting + country)</li> <li>- No limitations discussed</li> </ul> |                                                                                                                                                                                                                                                                                                                |   |                                                      |   |                                                                                   |   |                                                |

**Abbreviations:**

US = ultrasound

**Appendix 3: Data Charting Sheets.** Hygiene Management for Long-term Ventilated Persons in the Home Health Care Setting: A Scoping Review

| <b>Data charting sheet - for health care professional, patients, relatives</b> |                                                                                                                                                                                                                                                                                                                                                                                                                                                                                                                                                                                                                                                                                                                                                                               |
|--------------------------------------------------------------------------------|-------------------------------------------------------------------------------------------------------------------------------------------------------------------------------------------------------------------------------------------------------------------------------------------------------------------------------------------------------------------------------------------------------------------------------------------------------------------------------------------------------------------------------------------------------------------------------------------------------------------------------------------------------------------------------------------------------------------------------------------------------------------------------|
| <b>Study description</b>                                                       |                                                                                                                                                                                                                                                                                                                                                                                                                                                                                                                                                                                                                                                                                                                                                                               |
| <b>First author</b>                                                            | Neumann, Nadja                                                                                                                                                                                                                                                                                                                                                                                                                                                                                                                                                                                                                                                                                                                                                                |
| <b>Title</b>                                                                   | Multidrug-resistant organisms (MDRO) in patients in outpatient care in Rhine-Mine region, Germany, in 2014. Prevalence and risk factors                                                                                                                                                                                                                                                                                                                                                                                                                                                                                                                                                                                                                                       |
| <b>Year</b>                                                                    | 2015                                                                                                                                                                                                                                                                                                                                                                                                                                                                                                                                                                                                                                                                                                                                                                          |
| <b>Country</b>                                                                 | Germany                                                                                                                                                                                                                                                                                                                                                                                                                                                                                                                                                                                                                                                                                                                                                                       |
| <b>Study aims</b>                                                              | <ul style="list-style-type: none"> <li>- Prevalence of MDRO</li> <li>- Identification of risk factors for MDRO</li> <li>- Finding differences in IC nursing services vs. other nursing services with regard to the colonisation of MRSA/ MDRO</li> </ul>                                                                                                                                                                                                                                                                                                                                                                                                                                                                                                                      |
| <b>Methodology/Measures</b>                                                    | <p><b>Study design:</b> observational/ descriptive study</p> <p><b>Period data collection:</b> Oct – Dec 2014</p> <p><b>Recruitment:</b> 40/nursing services in Rhein-Main area were asked to take part (10/40 agreed to participate)</p> <p><b>Measures:</b></p> <p>a. Anamnesis</p> <ul style="list-style-type: none"> <li>- HALT-questionnaire: survey instrument to investigate infections + antibiotic use in nursing homes in Europe</li> </ul> <p>b. Swabs (nose, throat, anal)</p> <ul style="list-style-type: none"> <li>- Laboratory analysis of swabs (MRSA + MDRO)</li> </ul> <p><b>Statistical Analysis:</b></p> <ul style="list-style-type: none"> <li>- Differences nursing services with IC vs. without IC (Mann-Whitney, Odds Ratios, regression)</li> </ul> |
| <b>Setting, Participants</b>                                                   |                                                                                                                                                                                                                                                                                                                                                                                                                                                                                                                                                                                                                                                                                                                                                                               |
| <b>Sample size</b>                                                             | 486 patients (=10 nursing services in Rhine-Main area) <ul style="list-style-type: none"> <li>- <b>All patients</b> anamnestic survey</li> <li>- <b>269 (55,3%)</b> throat and/or nasal swab</li> <li>- <b>132 (27,3%)</b> anal swab</li> </ul>                                                                                                                                                                                                                                                                                                                                                                                                                                                                                                                               |
| <b>Sex</b>                                                                     | 32,9% of all patients male sex (50% male sex in IC group)                                                                                                                                                                                                                                                                                                                                                                                                                                                                                                                                                                                                                                                                                                                     |
| <b>Age of participation</b>                                                    | 36,9% (0% IC) >85 years                                                                                                                                                                                                                                                                                                                                                                                                                                                                                                                                                                                                                                                                                                                                                       |
| <b>Kind of disease</b>                                                         | Significant differences between nursing services:                                                                                                                                                                                                                                                                                                                                                                                                                                                                                                                                                                                                                                                                                                                             |

**Appendix 3: Data Charting Sheets.** Hygiene Management for Long-term Ventilated Persons in the Home Health Care Setting: A Scoping Review

|                                                                                                                              |                                                                                                                                                                                                                                                                                                                                | Nursing services without IC | Nursing services with IC |              |                          |      |                                                               |      |                                                  |
|------------------------------------------------------------------------------------------------------------------------------|--------------------------------------------------------------------------------------------------------------------------------------------------------------------------------------------------------------------------------------------------------------------------------------------------------------------------------|-----------------------------|--------------------------|--------------|--------------------------|------|---------------------------------------------------------------|------|--------------------------------------------------|
|                                                                                                                              | Incontinence                                                                                                                                                                                                                                                                                                                   | 27%                         | 70%                      |              |                          |      |                                                               |      |                                                  |
|                                                                                                                              | Disorientation                                                                                                                                                                                                                                                                                                                 | 20%                         | 40%                      |              |                          |      |                                                               |      |                                                  |
|                                                                                                                              | Level of care dependency >3                                                                                                                                                                                                                                                                                                    | 11%                         | 55%                      |              |                          |      |                                                               |      |                                                  |
|                                                                                                                              | Wheelchair assisted                                                                                                                                                                                                                                                                                                            | 16%                         | 55%                      |              |                          |      |                                                               |      |                                                  |
|                                                                                                                              | Urinary catheter                                                                                                                                                                                                                                                                                                               | 6%                          | 55%                      |              |                          |      |                                                               |      |                                                  |
|                                                                                                                              | Tracheostomy                                                                                                                                                                                                                                                                                                                   | 0%                          | 75%                      |              |                          |      |                                                               |      |                                                  |
|                                                                                                                              | Invasive ventilation                                                                                                                                                                                                                                                                                                           | 0%                          | 70%                      |              |                          |      |                                                               |      |                                                  |
|                                                                                                                              | PEG-Sonde                                                                                                                                                                                                                                                                                                                      | 2%                          | 70%                      |              |                          |      |                                                               |      |                                                  |
|                                                                                                                              | <i>(more detail: Tab. 1)</i>                                                                                                                                                                                                                                                                                                   |                             |                          |              |                          |      |                                                               |      |                                                  |
| <b>Kind of artificial ventilation (incl. duration)</b>                                                                       | No patient without IC had tracheostomy vs. 75% (15/20) patients of IC<br>- Invasively ventilated: 70% (14/20) of IC-patients                                                                                                                                                                                                   |                             |                          |              |                          |      |                                                               |      |                                                  |
| <b>Family participation</b>                                                                                                  | Not specified                                                                                                                                                                                                                                                                                                                  |                             |                          |              |                          |      |                                                               |      |                                                  |
| <b>Concept of home-based setting/Licensed beds</b>                                                                           | 10 nursing services in Rhine-Main area<br>- 9 "normal" nursing service<br>- 1 IC service                                                                                                                                                                                                                                       |                             |                          |              |                          |      |                                                               |      |                                                  |
| <b>Professions/Qualifications involved/Duration professional employment</b>                                                  | Ambulatory nursing services (normal + intensive)                                                                                                                                                                                                                                                                               |                             |                          |              |                          |      |                                                               |      |                                                  |
| <b>Cooperation (e.g. Lung specialist, Weaning centre)</b>                                                                    | Not specified                                                                                                                                                                                                                                                                                                                  |                             |                          |              |                          |      |                                                               |      |                                                  |
| <b>Key Findings - Hygiene management</b>                                                                                     |                                                                                                                                                                                                                                                                                                                                |                             |                          |              |                          |      |                                                               |      |                                                  |
| <b>Quality management for hygiene, e. g. Infection control practitioner, duration h for infection prevention and control</b> | Not specified                                                                                                                                                                                                                                                                                                                  |                             |                          |              |                          |      |                                                               |      |                                                  |
| <b>... - Training /education (incl. in- outdoor training)</b>                                                                | Not specified                                                                                                                                                                                                                                                                                                                  |                             |                          |              |                          |      |                                                               |      |                                                  |
| <b>... - Staff hygiene (incl. PPE, Hand hygiene)</b>                                                                         | Not specified                                                                                                                                                                                                                                                                                                                  |                             |                          |              |                          |      |                                                               |      |                                                  |
| <b>... - Relative/visitors (incl. Physicians/Therapists)</b>                                                                 | Not specified                                                                                                                                                                                                                                                                                                                  |                             |                          |              |                          |      |                                                               |      |                                                  |
| <b>... - Cleaning and disinfection aspects</b>                                                                               | In case of MRSA-detection, requesting a free sanitation kit was possible                                                                                                                                                                                                                                                       |                             |                          |              |                          |      |                                                               |      |                                                  |
| <b>... - Handling of medical devices</b>                                                                                     | Not specified                                                                                                                                                                                                                                                                                                                  |                             |                          |              |                          |      |                                                               |      |                                                  |
| <b>... - Waste management</b>                                                                                                | Not specified                                                                                                                                                                                                                                                                                                                  |                             |                          |              |                          |      |                                                               |      |                                                  |
| <b>... - Infectious critical activities (incl. MRSA, Screening, Surveillance)</b>                                            | <table border="1"> <thead> <tr> <th>Colonisation</th> <th>Significant risk factors</th> </tr> </thead> <tbody> <tr> <td>MRSA</td> <td>- Level of care dependency &gt;3<br/>- Hospitalisation &lt; 6 months</td> </tr> <tr> <td>ESBL</td> <td>- Disorientation<br/>- Hospitalisation &lt; 6 months</td> </tr> </tbody> </table> |                             |                          | Colonisation | Significant risk factors | MRSA | - Level of care dependency >3<br>- Hospitalisation < 6 months | ESBL | - Disorientation<br>- Hospitalisation < 6 months |
| Colonisation                                                                                                                 | Significant risk factors                                                                                                                                                                                                                                                                                                       |                             |                          |              |                          |      |                                                               |      |                                                  |
| MRSA                                                                                                                         | - Level of care dependency >3<br>- Hospitalisation < 6 months                                                                                                                                                                                                                                                                  |                             |                          |              |                          |      |                                                               |      |                                                  |
| ESBL                                                                                                                         | - Disorientation<br>- Hospitalisation < 6 months                                                                                                                                                                                                                                                                               |                             |                          |              |                          |      |                                                               |      |                                                  |

### Appendix 3: Data Charting Sheets. Hygiene Management for Long-term Ventilated Persons in the Home Health Care Setting: A Scoping Review

|                                                                                                                                                                                                                                                                                                                                                                                                                                                                                                                                                                                                                                                                                                                                                                                                                              |                                                                      |                                                                                                                                                      |              |
|------------------------------------------------------------------------------------------------------------------------------------------------------------------------------------------------------------------------------------------------------------------------------------------------------------------------------------------------------------------------------------------------------------------------------------------------------------------------------------------------------------------------------------------------------------------------------------------------------------------------------------------------------------------------------------------------------------------------------------------------------------------------------------------------------------------------------|----------------------------------------------------------------------|------------------------------------------------------------------------------------------------------------------------------------------------------|--------------|
|                                                                                                                                                                                                                                                                                                                                                                                                                                                                                                                                                                                                                                                                                                                                                                                                                              | MDRO                                                                 | <ul style="list-style-type: none"> <li>- Catheter/ stomata</li> <li>- Level of care dependency &gt;3</li> <li>- Positive history for MRSA</li> </ul> |              |
| ... - Caring for persons (prevention and infection control)                                                                                                                                                                                                                                                                                                                                                                                                                                                                                                                                                                                                                                                                                                                                                                  | Not specified                                                        |                                                                                                                                                      |              |
| ... - Handling of medication                                                                                                                                                                                                                                                                                                                                                                                                                                                                                                                                                                                                                                                                                                                                                                                                 | 1% of patients received an antibiotic on the day the smear was taken |                                                                                                                                                      |              |
| ... - Laundry hygiene                                                                                                                                                                                                                                                                                                                                                                                                                                                                                                                                                                                                                                                                                                                                                                                                        | Not specified                                                        |                                                                                                                                                      |              |
| ... - Kitchen hygiene                                                                                                                                                                                                                                                                                                                                                                                                                                                                                                                                                                                                                                                                                                                                                                                                        | Not specified                                                        |                                                                                                                                                      |              |
| <b>Microbiological findings</b>                                                                                                                                                                                                                                                                                                                                                                                                                                                                                                                                                                                                                                                                                                                                                                                              |                                                                      |                                                                                                                                                      |              |
| Significant differences between nursing services:                                                                                                                                                                                                                                                                                                                                                                                                                                                                                                                                                                                                                                                                                                                                                                            |                                                                      |                                                                                                                                                      |              |
|                                                                                                                                                                                                                                                                                                                                                                                                                                                                                                                                                                                                                                                                                                                                                                                                                              | "normal" nursing services                                            | IC-nursing services                                                                                                                                  | All services |
| MRSA colonisation                                                                                                                                                                                                                                                                                                                                                                                                                                                                                                                                                                                                                                                                                                                                                                                                            | 12.5%                                                                | 3.2%                                                                                                                                                 | 3.7%         |
| 3MRGN and/or ESBL                                                                                                                                                                                                                                                                                                                                                                                                                                                                                                                                                                                                                                                                                                                                                                                                            | 13.1%                                                                | 30%                                                                                                                                                  | 14.4.%       |
| 3MRGN                                                                                                                                                                                                                                                                                                                                                                                                                                                                                                                                                                                                                                                                                                                                                                                                                        | 30%                                                                  | 5.7                                                                                                                                                  | 7.6%         |
| 4MRGN                                                                                                                                                                                                                                                                                                                                                                                                                                                                                                                                                                                                                                                                                                                                                                                                                        | 0                                                                    | 0                                                                                                                                                    | 0            |
| <b>Conclusion/Limitations</b>                                                                                                                                                                                                                                                                                                                                                                                                                                                                                                                                                                                                                                                                                                                                                                                                |                                                                      |                                                                                                                                                      |              |
| <p><b>Conclusion:</b></p> <ul style="list-style-type: none"> <li>- <b>High prevalence of MRSA + MDRO-colonisation in outpatient care</b> <ul style="list-style-type: none"> <li>→ 3MRGN-colonisation 3x as high as in normal population</li> <li>→ essential: good hygiene procedures (hand hygiene, wound management, punctures/ injections, catheters, stomata, artificial respiratory)</li> <li>→ hospital hygiene + infection prevention to be applied in outpatient care (KRINKO)</li> </ul> </li> <li>- <b>Significant risk factors for MRSA/ MDRO colonisation:</b> hospitalisation &lt; 6 months, level of care dependency &gt; 3, disorientation, catheter/ stomata, positive history for MRSA</li> </ul> <p><b>Notes for ScR:</b></p> <ul style="list-style-type: none"> <li>- No limitations discussed</li> </ul> |                                                                      |                                                                                                                                                      |              |

#### Abbreviations:

ESBL = Erreger mit erweiterter Resistenz gegen Beta-Laktamantibiotika

HALT = healthcare-associated infections in long-term care facilities

IC = intensive care

MDRO = MRGN/ MRE = multiresistente (gramnegative) Erreger (3MRGN/ 4MRGN = Resistenz gegen Leitantibiotika aus drei/vier Antibiotikagruppen)

**Appendix 3: Data Charting Sheets.** Hygiene Management for Long-term Ventilated Persons in the Home Health Care Setting: A Scoping Review

| <b>Data charting sheet - for health care professional, patients, relatives</b> |                                                                                                                                                                                                                                                                                                                                                                                                                                                                                                                                                                                                                                                                                                            |
|--------------------------------------------------------------------------------|------------------------------------------------------------------------------------------------------------------------------------------------------------------------------------------------------------------------------------------------------------------------------------------------------------------------------------------------------------------------------------------------------------------------------------------------------------------------------------------------------------------------------------------------------------------------------------------------------------------------------------------------------------------------------------------------------------|
| <b>Study description</b>                                                       |                                                                                                                                                                                                                                                                                                                                                                                                                                                                                                                                                                                                                                                                                                            |
| <b>First author</b>                                                            | Prasad, Nishant                                                                                                                                                                                                                                                                                                                                                                                                                                                                                                                                                                                                                                                                                            |
| <b>Title</b>                                                                   | Asymptomatic rectal colonization with carbapenem-resistant <i>Enterobacteriaceae</i> and <i>Clostridium difficile</i> among residents of a long-term care facility in New York City                                                                                                                                                                                                                                                                                                                                                                                                                                                                                                                        |
| <b>Year</b>                                                                    | 2016                                                                                                                                                                                                                                                                                                                                                                                                                                                                                                                                                                                                                                                                                                       |
| <b>Country</b>                                                                 | USA                                                                                                                                                                                                                                                                                                                                                                                                                                                                                                                                                                                                                                                                                                        |
| <b>Study aims</b>                                                              | To determine prevalence of asymptomatic rectal colonisation with CDI or CRE in LTCF                                                                                                                                                                                                                                                                                                                                                                                                                                                                                                                                                                                                                        |
| <b>Methodology/Measures</b>                                                    | <p><b>Study design:</b> cross-sectional study</p> <p><b>Method:</b><br/>Rectal swabs over a 17-week period</p> <ul style="list-style-type: none"> <li>- Molecular analysis in laboratory</li> <li>- Analysis of risk factors or CRE + CDI</li> </ul> <p><b>Exclusion criteria:</b></p> <ul style="list-style-type: none"> <li>- Signs + symptoms of diarrhea</li> <li>- Documented CDI-associated infection/ treatment of CDI-infection</li> <li>- Residents on short-term rehabilitation floor</li> </ul> <p><b>Data analysis:</b></p> <ul style="list-style-type: none"> <li>- Statistical analysis using SAS</li> <li>- Independent t-test, fisher exact-test, logistic regression, p-values</li> </ul> |
| <b>Setting, Participants</b>                                                   |                                                                                                                                                                                                                                                                                                                                                                                                                                                                                                                                                                                                                                                                                                            |
| <b>Sample size</b>                                                             | 301 patients                                                                                                                                                                                                                                                                                                                                                                                                                                                                                                                                                                                                                                                                                               |
| <b>Sex</b>                                                                     | 63% female                                                                                                                                                                                                                                                                                                                                                                                                                                                                                                                                                                                                                                                                                                 |
| <b>Age of participation</b>                                                    | 75 years (median age); only adult patients                                                                                                                                                                                                                                                                                                                                                                                                                                                                                                                                                                                                                                                                 |
| <b>Kind of disease</b>                                                         | <p>Comorbid conditions:</p> <ul style="list-style-type: none"> <li>- 84% hypertension</li> <li>- 56% hyperlipidemia</li> <li>- 49% diabetes mellitus</li> <li>- 43% dementia</li> <li>- 37% coronary heart disease</li> <li>- 34% congestive heart failure</li> <li>- 26% COPD</li> </ul>                                                                                                                                                                                                                                                                                                                                                                                                                  |
| <b>Kind of artificial ventilation (incl. duration)</b>                         | Ventilated patients:                                                                                                                                                                                                                                                                                                                                                                                                                                                                                                                                                                                                                                                                                       |

**Appendix 3: Data Charting Sheets.** Hygiene Management for Long-term Ventilated Persons in the Home Health Care Setting: A Scoping Review

|                                                                                                                              |                                                                                                                                                                                                                                                                                                                                             |
|------------------------------------------------------------------------------------------------------------------------------|---------------------------------------------------------------------------------------------------------------------------------------------------------------------------------------------------------------------------------------------------------------------------------------------------------------------------------------------|
|                                                                                                                              | <ul style="list-style-type: none"> <li>- Represented 41% of cohort</li> <li>- Over 90% external feeding</li> <li>- &gt;30% had prior CDI-infection</li> <li>- 53% PPI within the last 60 days</li> </ul>                                                                                                                                    |
| <b>Family participation</b>                                                                                                  | Not specified                                                                                                                                                                                                                                                                                                                               |
| <b>Concept of home-based setting/Licensed beds</b>                                                                           | 80 bed ventilator unit (in a 320-bed medical centre-affiliated LTCF)                                                                                                                                                                                                                                                                        |
| <b>Professions/Qualifications involved/Duration professional employment</b>                                                  | Not specified                                                                                                                                                                                                                                                                                                                               |
| <b>Cooperation (e. g. Lung specialist, Weaning centre)</b>                                                                   | Not specified                                                                                                                                                                                                                                                                                                                               |
| <b>Key Findings - Hygiene management</b>                                                                                     |                                                                                                                                                                                                                                                                                                                                             |
| <b>Quality management for hygiene, e. g. Infection control practitioner, duration h for infection prevention and control</b> | Infection control isolation policies (not further described)                                                                                                                                                                                                                                                                                |
| <b>... - Training /education (incl. in- outdoor training)</b>                                                                | Not specified                                                                                                                                                                                                                                                                                                                               |
| <b>... - Staff hygiene (incl. PPE, Hand hygiene)</b>                                                                         | Not specified                                                                                                                                                                                                                                                                                                                               |
| <b>... - Relative/visitors (incl. Physicians/Therapists)</b>                                                                 | Not specified                                                                                                                                                                                                                                                                                                                               |
| <b>... - Cleaning and disinfection aspects</b>                                                                               | Not specified                                                                                                                                                                                                                                                                                                                               |
| <b>... - Handling of medical devices</b>                                                                                     | Not specified                                                                                                                                                                                                                                                                                                                               |
| <b>... - Waste management</b>                                                                                                | Not specified                                                                                                                                                                                                                                                                                                                               |
| <b>... - Infectious critical activities (incl. MRSA, Screening, Surveillance)</b>                                            | <i>S. microbiological findings above</i>                                                                                                                                                                                                                                                                                                    |
| <b>... - Caring for persons (prevention and infection control)</b>                                                           | Not specified                                                                                                                                                                                                                                                                                                                               |
| <b>... - Handling of medication</b>                                                                                          | Not specified                                                                                                                                                                                                                                                                                                                               |
| <b>... - Laundry hygiene</b>                                                                                                 | Not specified                                                                                                                                                                                                                                                                                                                               |
| <b>... - Kitchen hygiene</b>                                                                                                 | Not specified                                                                                                                                                                                                                                                                                                                               |
| <b>Microbiological findings</b>                                                                                              |                                                                                                                                                                                                                                                                                                                                             |
| <b>Colonisation rates</b>                                                                                                    | <ul style="list-style-type: none"> <li>- 19% asymptomatic CDI-colonisation</li> <li>- 19% CRE-colonisation</li> </ul>                                                                                                                                                                                                                       |
| <b>Colonisation with CRE was associated with</b>                                                                             | <ul style="list-style-type: none"> <li>- 19% history of CDI -infection (median 240 days since prior episode)</li> <li>- 45% history of CDI -infection + asymptomatic colonisation with CDI</li> <li>- 26% history of CDI -infection + colonisation of CRE</li> <li>- 17% history of CDI -infection + colonisation with CRE + CDI</li> </ul> |
| <b>Factors associated with CDI, CRE + concurrent CDI/ CRE</b>                                                                | <ul style="list-style-type: none"> <li>- Tracheostomy collar</li> <li>- Location on respiratory floor</li> <li>- Colonisation with CRE</li> </ul>                                                                                                                                                                                           |

**Appendix 3: Data Charting Sheets.** Hygiene Management for Long-term Ventilated Persons in the Home Health Care Setting: A Scoping Review

|                                                                                                                                                                                                                                                                                                                                                                                                                                                                                                                                                                                                                                                                                                                                  | <ul style="list-style-type: none"> <li>- Colonisation with CRE was associated with: MV, enteral feeds, PPI in the last 60 days, location on respiratory floors, hyperlipidaemia, COPD, colonisation with CDI</li> <li>- for patients with prior CDI-infection: lower number of days since prior CDI-infection was significantly associated with an increased risk of CDI-colonisation + concurrent CDI/CRE-colonisation</li> </ul> |
|----------------------------------------------------------------------------------------------------------------------------------------------------------------------------------------------------------------------------------------------------------------------------------------------------------------------------------------------------------------------------------------------------------------------------------------------------------------------------------------------------------------------------------------------------------------------------------------------------------------------------------------------------------------------------------------------------------------------------------|------------------------------------------------------------------------------------------------------------------------------------------------------------------------------------------------------------------------------------------------------------------------------------------------------------------------------------------------------------------------------------------------------------------------------------|
| Conclusion/Limitations                                                                                                                                                                                                                                                                                                                                                                                                                                                                                                                                                                                                                                                                                                           |                                                                                                                                                                                                                                                                                                                                                                                                                                    |
| <p><b>Conclusion:</b></p> <ul style="list-style-type: none"> <li>- strong association of colonisation with CDI/ CRE with disruption of normal flora (by MV/ enteral feeds) + prior CDI-infection</li> </ul> <p><b>Limitations:</b></p> <ul style="list-style-type: none"> <li>- retrospective analysis</li> <li>- multiple persons collected swabs + tabulated data</li> <li>- study was conducted in a single LTCF → results may not be generalizable to others with different characteristics</li> <li>- no data on antibiotic use available</li> </ul> <p><b>Notes for review:</b></p> <ul style="list-style-type: none"> <li>- Setting: stationary hospital, not outpatient care</li> <li>- No hygiene management</li> </ul> |                                                                                                                                                                                                                                                                                                                                                                                                                                    |

**Abbreviations:**

CDI = Clostridium difficile

CRE = carbapenem-resistant Enterobacteriaceae

LTCF = long-term care facility

MV = mechanical ventilation

PPI = proton pump inhibitor



**Appendix 3: Data Charting Sheets.** Hygiene Management for Long-term Ventilated Persons in the Home Health Care Setting: A Scoping Review

| <b>Data charting sheet - for health care professional, patients, relatives</b>                                                                                                                 |                                                                                                                                                                                                                                                                                                                                                                                                                                                                                                                                                                                                                                                                                                                                                                                                                                                                                                                                                                                                                                                                                                                                                                                                                                                                                                                                |                                                        |                        |                 |              |                                                                                                                                                                                                |                                                                                                                                                                                                                                                                       |                                                                            |  |
|------------------------------------------------------------------------------------------------------------------------------------------------------------------------------------------------|--------------------------------------------------------------------------------------------------------------------------------------------------------------------------------------------------------------------------------------------------------------------------------------------------------------------------------------------------------------------------------------------------------------------------------------------------------------------------------------------------------------------------------------------------------------------------------------------------------------------------------------------------------------------------------------------------------------------------------------------------------------------------------------------------------------------------------------------------------------------------------------------------------------------------------------------------------------------------------------------------------------------------------------------------------------------------------------------------------------------------------------------------------------------------------------------------------------------------------------------------------------------------------------------------------------------------------|--------------------------------------------------------|------------------------|-----------------|--------------|------------------------------------------------------------------------------------------------------------------------------------------------------------------------------------------------|-----------------------------------------------------------------------------------------------------------------------------------------------------------------------------------------------------------------------------------------------------------------------|----------------------------------------------------------------------------|--|
| <b>Study description</b>                                                                                                                                                                       |                                                                                                                                                                                                                                                                                                                                                                                                                                                                                                                                                                                                                                                                                                                                                                                                                                                                                                                                                                                                                                                                                                                                                                                                                                                                                                                                |                                                        |                        |                 |              |                                                                                                                                                                                                |                                                                                                                                                                                                                                                                       |                                                                            |  |
| <b>First author</b>                                                                                                                                                                            | Schwerdtner, Nora-Lynn                                                                                                                                                                                                                                                                                                                                                                                                                                                                                                                                                                                                                                                                                                                                                                                                                                                                                                                                                                                                                                                                                                                                                                                                                                                                                                         |                                                        |                        |                 |              |                                                                                                                                                                                                |                                                                                                                                                                                                                                                                       |                                                                            |  |
| <b>Title</b>                                                                                                                                                                                   | Herausforderungen im Umgang mit MRE in außerklinischen Intensivpflege-Wohngemeinschaften<br>Erfahrungsbericht und Ergebnisse einer Prävalenzerhebung zu multiresistenten Erregern im Stadtgebiet Jena                                                                                                                                                                                                                                                                                                                                                                                                                                                                                                                                                                                                                                                                                                                                                                                                                                                                                                                                                                                                                                                                                                                          |                                                        |                        |                 |              |                                                                                                                                                                                                |                                                                                                                                                                                                                                                                       |                                                                            |  |
| <b>Year</b>                                                                                                                                                                                    | 2020                                                                                                                                                                                                                                                                                                                                                                                                                                                                                                                                                                                                                                                                                                                                                                                                                                                                                                                                                                                                                                                                                                                                                                                                                                                                                                                           |                                                        |                        |                 |              |                                                                                                                                                                                                |                                                                                                                                                                                                                                                                       |                                                                            |  |
| <b>Country</b>                                                                                                                                                                                 | Germany                                                                                                                                                                                                                                                                                                                                                                                                                                                                                                                                                                                                                                                                                                                                                                                                                                                                                                                                                                                                                                                                                                                                                                                                                                                                                                                        |                                                        |                        |                 |              |                                                                                                                                                                                                |                                                                                                                                                                                                                                                                       |                                                                            |  |
| <b>Study aims</b>                                                                                                                                                                              | Prevalence of MDRO + evaluation of hygiene management in AKI-flat-sharing community in Jena                                                                                                                                                                                                                                                                                                                                                                                                                                                                                                                                                                                                                                                                                                                                                                                                                                                                                                                                                                                                                                                                                                                                                                                                                                    |                                                        |                        |                 |              |                                                                                                                                                                                                |                                                                                                                                                                                                                                                                       |                                                                            |  |
| <b>Methodology/Measures</b>                                                                                                                                                                    | <p><b>Study design:</b> observational/ descriptive</p> <p><b>Background:</b> Reported evidence of MDRO-infection for initially 3 residents in 1 FSC</p> <p>→ Occasional inspection + prevalence survey (MDRO-screening) of affected FSC<br/>→ Additional survey of 3 providers of IC-FSC</p> <p><b>Data Collection:</b></p> <table border="1" style="width: 100%; border-collapse: collapse;"> <thead> <tr> <th style="text-align: center;">Occasional, unannounced inspection + prevalence survey</th> <th style="text-align: center;">MDRO-prevalence survey</th> </tr> </thead> <tbody> <tr> <td>In affected FSC</td> <td>In all 3 FSC</td> </tr> <tr> <td> <ul style="list-style-type: none"> <li>- Screening for MDRO + MRSA: nose/throat, groin, rectal swabs + on devices</li> <li>- Inspection: Evaluation of practiced hygiene management</li> </ul> </td> <td> <ul style="list-style-type: none"> <li>- standardized questionnaires for structural data (number + qualification of med. staff, number of clients cared for, number of beds, type + number of devices)</li> <li>- Anamnestic data: MDRO colonisation rates</li> </ul> </td> </tr> <tr> <td>Repeated screening after implementation of hygiene management requirements</td> <td></td> </tr> </tbody> </table> <p><b>Data Analysis:</b> Descriptive</p> | Occasional, unannounced inspection + prevalence survey | MDRO-prevalence survey | In affected FSC | In all 3 FSC | <ul style="list-style-type: none"> <li>- Screening for MDRO + MRSA: nose/throat, groin, rectal swabs + on devices</li> <li>- Inspection: Evaluation of practiced hygiene management</li> </ul> | <ul style="list-style-type: none"> <li>- standardized questionnaires for structural data (number + qualification of med. staff, number of clients cared for, number of beds, type + number of devices)</li> <li>- Anamnestic data: MDRO colonisation rates</li> </ul> | Repeated screening after implementation of hygiene management requirements |  |
| Occasional, unannounced inspection + prevalence survey                                                                                                                                         | MDRO-prevalence survey                                                                                                                                                                                                                                                                                                                                                                                                                                                                                                                                                                                                                                                                                                                                                                                                                                                                                                                                                                                                                                                                                                                                                                                                                                                                                                         |                                                        |                        |                 |              |                                                                                                                                                                                                |                                                                                                                                                                                                                                                                       |                                                                            |  |
| In affected FSC                                                                                                                                                                                | In all 3 FSC                                                                                                                                                                                                                                                                                                                                                                                                                                                                                                                                                                                                                                                                                                                                                                                                                                                                                                                                                                                                                                                                                                                                                                                                                                                                                                                   |                                                        |                        |                 |              |                                                                                                                                                                                                |                                                                                                                                                                                                                                                                       |                                                                            |  |
| <ul style="list-style-type: none"> <li>- Screening for MDRO + MRSA: nose/throat, groin, rectal swabs + on devices</li> <li>- Inspection: Evaluation of practiced hygiene management</li> </ul> | <ul style="list-style-type: none"> <li>- standardized questionnaires for structural data (number + qualification of med. staff, number of clients cared for, number of beds, type + number of devices)</li> <li>- Anamnestic data: MDRO colonisation rates</li> </ul>                                                                                                                                                                                                                                                                                                                                                                                                                                                                                                                                                                                                                                                                                                                                                                                                                                                                                                                                                                                                                                                          |                                                        |                        |                 |              |                                                                                                                                                                                                |                                                                                                                                                                                                                                                                       |                                                                            |  |
| Repeated screening after implementation of hygiene management requirements                                                                                                                     |                                                                                                                                                                                                                                                                                                                                                                                                                                                                                                                                                                                                                                                                                                                                                                                                                                                                                                                                                                                                                                                                                                                                                                                                                                                                                                                                |                                                        |                        |                 |              |                                                                                                                                                                                                |                                                                                                                                                                                                                                                                       |                                                                            |  |

**Appendix 3: Data Charting Sheets.** Hygiene Management for Long-term Ventilated Persons in the Home Health Care Setting: A Scoping Review

| <b>Setting, Participants</b>                                                                                                 |                                                                                                                                                                                                                                                                                                                                                                                                         |
|------------------------------------------------------------------------------------------------------------------------------|---------------------------------------------------------------------------------------------------------------------------------------------------------------------------------------------------------------------------------------------------------------------------------------------------------------------------------------------------------------------------------------------------------|
| <b>Sample size</b>                                                                                                           | 3/4 known FSC in Jena<br>24 patients                                                                                                                                                                                                                                                                                                                                                                    |
| <b>Sex</b>                                                                                                                   | Not specified                                                                                                                                                                                                                                                                                                                                                                                           |
| <b>Age of participation</b>                                                                                                  | 3 patients < 18 years old                                                                                                                                                                                                                                                                                                                                                                               |
| <b>Kind of disease</b>                                                                                                       | <ul style="list-style-type: none"> <li>- <b>18/24</b> (75%) level of care dependency 4 + 5</li> <li>- <b>4/24</b> (17%) mobile on their own</li> </ul> <p>In total 75 devices:</p> <ul style="list-style-type: none"> <li>- <b>21/24</b> (88%) PEG-Sonde</li> <li>- <b>11/24</b> (46%) urinary catheter</li> <li>- <b>4/24</b> (17%) suprapubic catheter</li> <li>- <b>7/24</b> (29%) wounds</li> </ul> |
| <b>Kind of artificial ventilation (incl. duration)</b>                                                                       | <ul style="list-style-type: none"> <li>- <b>4/24</b> (17%) permanent respirator</li> <li>- <b>7/24</b> (29%) &lt;24h respirator</li> <li>- <b>21/24</b> (88%) Tracheal cannula</li> </ul>                                                                                                                                                                                                               |
| <b>Family participation</b>                                                                                                  | Not specified                                                                                                                                                                                                                                                                                                                                                                                           |
| <b>Concept of home-based setting/Licensed beds</b>                                                                           | <ul style="list-style-type: none"> <li>- 3 FSC (supervised by 2/3 nursing services in Jena)</li> <li>- 24/40 (60%) occupied beds</li> </ul>                                                                                                                                                                                                                                                             |
| <b>Professions/Qualifications involved/Duration professional employment</b>                                                  | <p>In total 60 employees in 3 FSC</p> <ul style="list-style-type: none"> <li>- 14 geriatric nurses (Altenpfleger)</li> <li>- 17 certified nurse (Krankenpfleger)</li> <li>- 3 nursing assistant (Pflegehelfer)</li> <li>- 4 other</li> </ul>                                                                                                                                                            |
| <b>Cooperation (e. g. Lung specialist, Weaning centre)</b>                                                                   | Not specified                                                                                                                                                                                                                                                                                                                                                                                           |
| <b>Key Findings - Hygiene management</b>                                                                                     |                                                                                                                                                                                                                                                                                                                                                                                                         |
| <b>Quality management for hygiene, e. g. Infection control practitioner, duration h for infection prevention and control</b> | <p>Occasional inspection in affected FSC:</p> <ul style="list-style-type: none"> <li>- Desolate hygiene management (e.g. hygiene plan not available, incorrect/ missing information on disinfection, contamination on surfaces + medical equipment)</li> <li>- Insufficient structural + technical requirements</li> </ul>                                                                              |
| <b>... - Training /education (incl. in- outdoor training)</b>                                                                | Occasional inspection: knowledge deficits regarding basic hygiene despite annual training                                                                                                                                                                                                                                                                                                               |
| <b>... - Staff hygiene (incl. PPE, Hand hygiene)</b>                                                                         | 1/3 FSC: missing hygiene equipment such as hand disinfectant dispensers and washbasins in nursing staff' dressing rooms                                                                                                                                                                                                                                                                                 |
| <b>... - Relative/visitors (incl. Physicians/Therapists)</b>                                                                 | Not specified                                                                                                                                                                                                                                                                                                                                                                                           |
| <b>... - Cleaning and disinfection aspects</b>                                                                               | Not specified                                                                                                                                                                                                                                                                                                                                                                                           |

### Appendix 3: Data Charting Sheets. Hygiene Management for Long-term Ventilated Persons in the Home Health Care Setting: A Scoping Review

| ... - Handling of medical devices                                                                                                                                                                                                                                                                                                                                                                                                                                                                                                                                                                                                                                                                                                                        | Not specified                                                                                                                                                                                                                                                                                                                                         |                                 |                               |                                                                                                                                             |                                                                                                                                                                                                                                                                                                                                                       |
|----------------------------------------------------------------------------------------------------------------------------------------------------------------------------------------------------------------------------------------------------------------------------------------------------------------------------------------------------------------------------------------------------------------------------------------------------------------------------------------------------------------------------------------------------------------------------------------------------------------------------------------------------------------------------------------------------------------------------------------------------------|-------------------------------------------------------------------------------------------------------------------------------------------------------------------------------------------------------------------------------------------------------------------------------------------------------------------------------------------------------|---------------------------------|-------------------------------|---------------------------------------------------------------------------------------------------------------------------------------------|-------------------------------------------------------------------------------------------------------------------------------------------------------------------------------------------------------------------------------------------------------------------------------------------------------------------------------------------------------|
| ... - Waste management                                                                                                                                                                                                                                                                                                                                                                                                                                                                                                                                                                                                                                                                                                                                   | Not specified                                                                                                                                                                                                                                                                                                                                         |                                 |                               |                                                                                                                                             |                                                                                                                                                                                                                                                                                                                                                       |
| ... - Infectious critical activities (incl. MRSA, Screening, Surveillance)                                                                                                                                                                                                                                                                                                                                                                                                                                                                                                                                                                                                                                                                               | - <b>1/3 FSC</b> admission screening by GP                                                                                                                                                                                                                                                                                                            |                                 |                               |                                                                                                                                             |                                                                                                                                                                                                                                                                                                                                                       |
| ... - Caring for persons (prevention and infection control)                                                                                                                                                                                                                                                                                                                                                                                                                                                                                                                                                                                                                                                                                              | Not specified                                                                                                                                                                                                                                                                                                                                         |                                 |                               |                                                                                                                                             |                                                                                                                                                                                                                                                                                                                                                       |
| ... - Handling of medication                                                                                                                                                                                                                                                                                                                                                                                                                                                                                                                                                                                                                                                                                                                             | - <b>18/24</b> (75%) patients received antibiotics < 6 months                                                                                                                                                                                                                                                                                         |                                 |                               |                                                                                                                                             |                                                                                                                                                                                                                                                                                                                                                       |
| ... - Laundry hygiene                                                                                                                                                                                                                                                                                                                                                                                                                                                                                                                                                                                                                                                                                                                                    | Not specified                                                                                                                                                                                                                                                                                                                                         |                                 |                               |                                                                                                                                             |                                                                                                                                                                                                                                                                                                                                                       |
| ... - Kitchen hygiene                                                                                                                                                                                                                                                                                                                                                                                                                                                                                                                                                                                                                                                                                                                                    | Not specified                                                                                                                                                                                                                                                                                                                                         |                                 |                               |                                                                                                                                             |                                                                                                                                                                                                                                                                                                                                                       |
| <b>Microbiological findings</b>                                                                                                                                                                                                                                                                                                                                                                                                                                                                                                                                                                                                                                                                                                                          |                                                                                                                                                                                                                                                                                                                                                       |                                 |                               |                                                                                                                                             |                                                                                                                                                                                                                                                                                                                                                       |
| <table border="1" style="width: 100%;"> <thead> <tr> <th style="width: 50%;">Anamnestic MRE evidence in 3 WG</th> <th style="width: 50%;">Occasional Screening in 1 AKI</th> </tr> </thead> <tbody> <tr> <td> <ul style="list-style-type: none"> <li>- 54% positive MRE-evidence</li> <li>- 29% 3MRGN</li> <li>- 23% 4MRGN</li> <li>- 21% MRSA</li> </ul> </td> <td> <ul style="list-style-type: none"> <li>- 6/6 patients with multiple colonisation (14 positive MDRO- evidences)</li> <li>- 3MRGN + 4MRGN were found both on medical devices (tracheal cannulae, catheter + PEG-Sonde) + patients themselves</li> <li>- MRSA detection on tracheal cannulae</li> </ul> <p><i>(for more details s. p. 7, Tab. 2)</i></p> </td> </tr> </tbody> </table> |                                                                                                                                                                                                                                                                                                                                                       | Anamnestic MRE evidence in 3 WG | Occasional Screening in 1 AKI | <ul style="list-style-type: none"> <li>- 54% positive MRE-evidence</li> <li>- 29% 3MRGN</li> <li>- 23% 4MRGN</li> <li>- 21% MRSA</li> </ul> | <ul style="list-style-type: none"> <li>- 6/6 patients with multiple colonisation (14 positive MDRO- evidences)</li> <li>- 3MRGN + 4MRGN were found both on medical devices (tracheal cannulae, catheter + PEG-Sonde) + patients themselves</li> <li>- MRSA detection on tracheal cannulae</li> </ul> <p><i>(for more details s. p. 7, Tab. 2)</i></p> |
| Anamnestic MRE evidence in 3 WG                                                                                                                                                                                                                                                                                                                                                                                                                                                                                                                                                                                                                                                                                                                          | Occasional Screening in 1 AKI                                                                                                                                                                                                                                                                                                                         |                                 |                               |                                                                                                                                             |                                                                                                                                                                                                                                                                                                                                                       |
| <ul style="list-style-type: none"> <li>- 54% positive MRE-evidence</li> <li>- 29% 3MRGN</li> <li>- 23% 4MRGN</li> <li>- 21% MRSA</li> </ul>                                                                                                                                                                                                                                                                                                                                                                                                                                                                                                                                                                                                              | <ul style="list-style-type: none"> <li>- 6/6 patients with multiple colonisation (14 positive MDRO- evidences)</li> <li>- 3MRGN + 4MRGN were found both on medical devices (tracheal cannulae, catheter + PEG-Sonde) + patients themselves</li> <li>- MRSA detection on tracheal cannulae</li> </ul> <p><i>(for more details s. p. 7, Tab. 2)</i></p> |                                 |                               |                                                                                                                                             |                                                                                                                                                                                                                                                                                                                                                       |
| <b>Conclusion/Limitations</b>                                                                                                                                                                                                                                                                                                                                                                                                                                                                                                                                                                                                                                                                                                                            |                                                                                                                                                                                                                                                                                                                                                       |                                 |                               |                                                                                                                                             |                                                                                                                                                                                                                                                                                                                                                       |
| <p><b>Conclusion:</b></p> <ul style="list-style-type: none"> <li>- Multiple colonisations in 1 FSC is attributed to desolate hygiene management</li> <li>- High device application rate in all 3 FSC (75 devices for 24 patients)</li> </ul> <p><b>Limitation:</b></p> <ul style="list-style-type: none"> <li>- Anamnestic survey was verified by screening only in 1 FSC</li> <li>- City of Jena only: small database</li> </ul> <p><b>Notes for Review:</b></p> <ul style="list-style-type: none"> <li>- Desolate hygiene management only described as an example with experts from the inspection report</li> <li>- Hygiene management of other 2 FSC not described at all</li> </ul>                                                                 |                                                                                                                                                                                                                                                                                                                                                       |                                 |                               |                                                                                                                                             |                                                                                                                                                                                                                                                                                                                                                       |

#### Abbreviations:

AKI = außerklinische Intensivpflege

MDRO = multidrug resistant organisms (MRE, MRGN)

FSC = flat-sharing community

GP = general practitioner

**Appendix 3: Data Charting Sheets.** Hygiene Management for Long-term Ventilated Persons in the Home Health Care Setting: A Scoping Review

| Data charting sheet - for health care professional, patients, relatives |                                                                                                                                                                                                                                                                                                                                                                                                                                                                                                                                                                                                                                                                                                                                                                                                                                                                                                                                                                                                                                                                                                                                                                                                                                                                                                                                                                                                                                                                                                                                                                                                                                                                                                                                                                                                                                                                                                                                                                                                                  |                                                                                                                                                                                                                                                                                                                                                                                                                  |  |              |              |       |                                                                             |  |      |                           |                                                                                                                          |     |                                     |  |      |                                                                                                                                                                                                                                                                                                                                                                                                                                                                                                   |                                                                                                                                                                                                                                                                                                                                                                                                                  |
|-------------------------------------------------------------------------|------------------------------------------------------------------------------------------------------------------------------------------------------------------------------------------------------------------------------------------------------------------------------------------------------------------------------------------------------------------------------------------------------------------------------------------------------------------------------------------------------------------------------------------------------------------------------------------------------------------------------------------------------------------------------------------------------------------------------------------------------------------------------------------------------------------------------------------------------------------------------------------------------------------------------------------------------------------------------------------------------------------------------------------------------------------------------------------------------------------------------------------------------------------------------------------------------------------------------------------------------------------------------------------------------------------------------------------------------------------------------------------------------------------------------------------------------------------------------------------------------------------------------------------------------------------------------------------------------------------------------------------------------------------------------------------------------------------------------------------------------------------------------------------------------------------------------------------------------------------------------------------------------------------------------------------------------------------------------------------------------------------|------------------------------------------------------------------------------------------------------------------------------------------------------------------------------------------------------------------------------------------------------------------------------------------------------------------------------------------------------------------------------------------------------------------|--|--------------|--------------|-------|-----------------------------------------------------------------------------|--|------|---------------------------|--------------------------------------------------------------------------------------------------------------------------|-----|-------------------------------------|--|------|---------------------------------------------------------------------------------------------------------------------------------------------------------------------------------------------------------------------------------------------------------------------------------------------------------------------------------------------------------------------------------------------------------------------------------------------------------------------------------------------------|------------------------------------------------------------------------------------------------------------------------------------------------------------------------------------------------------------------------------------------------------------------------------------------------------------------------------------------------------------------------------------------------------------------|
| <b>Study description</b>                                                |                                                                                                                                                                                                                                                                                                                                                                                                                                                                                                                                                                                                                                                                                                                                                                                                                                                                                                                                                                                                                                                                                                                                                                                                                                                                                                                                                                                                                                                                                                                                                                                                                                                                                                                                                                                                                                                                                                                                                                                                                  |                                                                                                                                                                                                                                                                                                                                                                                                                  |  |              |              |       |                                                                             |  |      |                           |                                                                                                                          |     |                                     |  |      |                                                                                                                                                                                                                                                                                                                                                                                                                                                                                                   |                                                                                                                                                                                                                                                                                                                                                                                                                  |
| <b>First author</b>                                                     | Toussaint, Michel                                                                                                                                                                                                                                                                                                                                                                                                                                                                                                                                                                                                                                                                                                                                                                                                                                                                                                                                                                                                                                                                                                                                                                                                                                                                                                                                                                                                                                                                                                                                                                                                                                                                                                                                                                                                                                                                                                                                                                                                |                                                                                                                                                                                                                                                                                                                                                                                                                  |  |              |              |       |                                                                             |  |      |                           |                                                                                                                          |     |                                     |  |      |                                                                                                                                                                                                                                                                                                                                                                                                                                                                                                   |                                                                                                                                                                                                                                                                                                                                                                                                                  |
| <b>Title</b>                                                            | Is disinfection of mechanical ventilation tubing needed at home?                                                                                                                                                                                                                                                                                                                                                                                                                                                                                                                                                                                                                                                                                                                                                                                                                                                                                                                                                                                                                                                                                                                                                                                                                                                                                                                                                                                                                                                                                                                                                                                                                                                                                                                                                                                                                                                                                                                                                 |                                                                                                                                                                                                                                                                                                                                                                                                                  |  |              |              |       |                                                                             |  |      |                           |                                                                                                                          |     |                                     |  |      |                                                                                                                                                                                                                                                                                                                                                                                                                                                                                                   |                                                                                                                                                                                                                                                                                                                                                                                                                  |
| <b>Year</b>                                                             | 2006                                                                                                                                                                                                                                                                                                                                                                                                                                                                                                                                                                                                                                                                                                                                                                                                                                                                                                                                                                                                                                                                                                                                                                                                                                                                                                                                                                                                                                                                                                                                                                                                                                                                                                                                                                                                                                                                                                                                                                                                             |                                                                                                                                                                                                                                                                                                                                                                                                                  |  |              |              |       |                                                                             |  |      |                           |                                                                                                                          |     |                                     |  |      |                                                                                                                                                                                                                                                                                                                                                                                                                                                                                                   |                                                                                                                                                                                                                                                                                                                                                                                                                  |
| <b>Country</b>                                                          | Belgium                                                                                                                                                                                                                                                                                                                                                                                                                                                                                                                                                                                                                                                                                                                                                                                                                                                                                                                                                                                                                                                                                                                                                                                                                                                                                                                                                                                                                                                                                                                                                                                                                                                                                                                                                                                                                                                                                                                                                                                                          |                                                                                                                                                                                                                                                                                                                                                                                                                  |  |              |              |       |                                                                             |  |      |                           |                                                                                                                          |     |                                     |  |      |                                                                                                                                                                                                                                                                                                                                                                                                                                                                                                   |                                                                                                                                                                                                                                                                                                                                                                                                                  |
| <b>Study aims</b>                                                       | <ul style="list-style-type: none"> <li>- To determine the HVC cleanliness + sterility of HVC used by home ventilated patients</li> <li>- To determine efficiency of tubing cleaning + decontamination protocols recommended to patients</li> </ul>                                                                                                                                                                                                                                                                                                                                                                                                                                                                                                                                                                                                                                                                                                                                                                                                                                                                                                                                                                                                                                                                                                                                                                                                                                                                                                                                                                                                                                                                                                                                                                                                                                                                                                                                                               |                                                                                                                                                                                                                                                                                                                                                                                                                  |  |              |              |       |                                                                             |  |      |                           |                                                                                                                          |     |                                     |  |      |                                                                                                                                                                                                                                                                                                                                                                                                                                                                                                   |                                                                                                                                                                                                                                                                                                                                                                                                                  |
| <b>Methodology/Measures</b>                                             | <p><b>Study design:</b> Prospective Cohort Study</p> <p><b>Method:</b></p> <ul style="list-style-type: none"> <li>- Prior to the study: Patients had received “Low Level Decontamination + Cleaning”-Protocol (written + taught); used for &gt; 12 months (<i>s. category “Training”</i>)</li> <li>- 39 used + 7 new EVAs (as control) were examined in 2 different experiments:</li> </ul> <table border="1" style="width: 100%; border-collapse: collapse;"> <thead> <tr> <th></th> <th style="text-align: center;">Experiment 1</th> <th style="text-align: center;">Experiment 2</th> </tr> </thead> <tbody> <tr> <td>Where</td> <td colspan="2">During hospitalization OR during patient consultations in the centre for MV</td> </tr> <tr> <td>When</td> <td>After the patient arrived</td> <td> <ul style="list-style-type: none"> <li>- The day after Exp. 1</li> <li>- After cleaning done by investigators</li> </ul> </td> </tr> <tr> <td>Who</td> <td colspan="2">Exp. 1 + 2 by the same investigator</td> </tr> <tr> <td>What</td> <td> <p><b>Analysis:</b></p> <p><b>1. Visual</b> (EVA + complete circuit):</p> <ul style="list-style-type: none"> <li>- 10-point scale (judged “dirty” = 2/10 or lower) + 4 criteria (*) of severity of visual dirtiness</li> <li>- 10 points maximum was also given for the full circuit with averaging of the mean score of the individual tubing parts</li> </ul> <p>(*) colour (1 point = light; 3 points = dark); (2) incrustation (0 = disappears; 2 = stays); (3) extent (1 = particle; 2 =</p> </td> <td> <p>a. <b>Cleaning</b> by investigators (decided at random):</p> <ul style="list-style-type: none"> <li>- Sequence A: HAC-cleaning (decontamination by 15min submersion in a chemical 5% HAC-bath)</li> <li>- Sequence B: dishwasher (90min programme at a temperature &gt;65°C + classical dishwasher powder)</li> </ul> <p>b. <b>Analysis</b></p> <ul style="list-style-type: none"> <li>- s. Exp. 1</li> </ul> </td> </tr> </tbody> </table> |                                                                                                                                                                                                                                                                                                                                                                                                                  |  | Experiment 1 | Experiment 2 | Where | During hospitalization OR during patient consultations in the centre for MV |  | When | After the patient arrived | <ul style="list-style-type: none"> <li>- The day after Exp. 1</li> <li>- After cleaning done by investigators</li> </ul> | Who | Exp. 1 + 2 by the same investigator |  | What | <p><b>Analysis:</b></p> <p><b>1. Visual</b> (EVA + complete circuit):</p> <ul style="list-style-type: none"> <li>- 10-point scale (judged “dirty” = 2/10 or lower) + 4 criteria (*) of severity of visual dirtiness</li> <li>- 10 points maximum was also given for the full circuit with averaging of the mean score of the individual tubing parts</li> </ul> <p>(*) colour (1 point = light; 3 points = dark); (2) incrustation (0 = disappears; 2 = stays); (3) extent (1 = particle; 2 =</p> | <p>a. <b>Cleaning</b> by investigators (decided at random):</p> <ul style="list-style-type: none"> <li>- Sequence A: HAC-cleaning (decontamination by 15min submersion in a chemical 5% HAC-bath)</li> <li>- Sequence B: dishwasher (90min programme at a temperature &gt;65°C + classical dishwasher powder)</li> </ul> <p>b. <b>Analysis</b></p> <ul style="list-style-type: none"> <li>- s. Exp. 1</li> </ul> |
|                                                                         | Experiment 1                                                                                                                                                                                                                                                                                                                                                                                                                                                                                                                                                                                                                                                                                                                                                                                                                                                                                                                                                                                                                                                                                                                                                                                                                                                                                                                                                                                                                                                                                                                                                                                                                                                                                                                                                                                                                                                                                                                                                                                                     | Experiment 2                                                                                                                                                                                                                                                                                                                                                                                                     |  |              |              |       |                                                                             |  |      |                           |                                                                                                                          |     |                                     |  |      |                                                                                                                                                                                                                                                                                                                                                                                                                                                                                                   |                                                                                                                                                                                                                                                                                                                                                                                                                  |
| Where                                                                   | During hospitalization OR during patient consultations in the centre for MV                                                                                                                                                                                                                                                                                                                                                                                                                                                                                                                                                                                                                                                                                                                                                                                                                                                                                                                                                                                                                                                                                                                                                                                                                                                                                                                                                                                                                                                                                                                                                                                                                                                                                                                                                                                                                                                                                                                                      |                                                                                                                                                                                                                                                                                                                                                                                                                  |  |              |              |       |                                                                             |  |      |                           |                                                                                                                          |     |                                     |  |      |                                                                                                                                                                                                                                                                                                                                                                                                                                                                                                   |                                                                                                                                                                                                                                                                                                                                                                                                                  |
| When                                                                    | After the patient arrived                                                                                                                                                                                                                                                                                                                                                                                                                                                                                                                                                                                                                                                                                                                                                                                                                                                                                                                                                                                                                                                                                                                                                                                                                                                                                                                                                                                                                                                                                                                                                                                                                                                                                                                                                                                                                                                                                                                                                                                        | <ul style="list-style-type: none"> <li>- The day after Exp. 1</li> <li>- After cleaning done by investigators</li> </ul>                                                                                                                                                                                                                                                                                         |  |              |              |       |                                                                             |  |      |                           |                                                                                                                          |     |                                     |  |      |                                                                                                                                                                                                                                                                                                                                                                                                                                                                                                   |                                                                                                                                                                                                                                                                                                                                                                                                                  |
| Who                                                                     | Exp. 1 + 2 by the same investigator                                                                                                                                                                                                                                                                                                                                                                                                                                                                                                                                                                                                                                                                                                                                                                                                                                                                                                                                                                                                                                                                                                                                                                                                                                                                                                                                                                                                                                                                                                                                                                                                                                                                                                                                                                                                                                                                                                                                                                              |                                                                                                                                                                                                                                                                                                                                                                                                                  |  |              |              |       |                                                                             |  |      |                           |                                                                                                                          |     |                                     |  |      |                                                                                                                                                                                                                                                                                                                                                                                                                                                                                                   |                                                                                                                                                                                                                                                                                                                                                                                                                  |
| What                                                                    | <p><b>Analysis:</b></p> <p><b>1. Visual</b> (EVA + complete circuit):</p> <ul style="list-style-type: none"> <li>- 10-point scale (judged “dirty” = 2/10 or lower) + 4 criteria (*) of severity of visual dirtiness</li> <li>- 10 points maximum was also given for the full circuit with averaging of the mean score of the individual tubing parts</li> </ul> <p>(*) colour (1 point = light; 3 points = dark); (2) incrustation (0 = disappears; 2 = stays); (3) extent (1 = particle; 2 =</p>                                                                                                                                                                                                                                                                                                                                                                                                                                                                                                                                                                                                                                                                                                                                                                                                                                                                                                                                                                                                                                                                                                                                                                                                                                                                                                                                                                                                                                                                                                                | <p>a. <b>Cleaning</b> by investigators (decided at random):</p> <ul style="list-style-type: none"> <li>- Sequence A: HAC-cleaning (decontamination by 15min submersion in a chemical 5% HAC-bath)</li> <li>- Sequence B: dishwasher (90min programme at a temperature &gt;65°C + classical dishwasher powder)</li> </ul> <p>b. <b>Analysis</b></p> <ul style="list-style-type: none"> <li>- s. Exp. 1</li> </ul> |  |              |              |       |                                                                             |  |      |                           |                                                                                                                          |     |                                     |  |      |                                                                                                                                                                                                                                                                                                                                                                                                                                                                                                   |                                                                                                                                                                                                                                                                                                                                                                                                                  |

**Appendix 3: Data Charting Sheets.** Hygiene Management for Long-term Ventilated Persons in the Home Health Care Setting: A Scoping Review

|                                                                             |                                                                                                                                                                                                                                                                                                                                                                                                                                                                                                                                                                                                                                        |
|-----------------------------------------------------------------------------|----------------------------------------------------------------------------------------------------------------------------------------------------------------------------------------------------------------------------------------------------------------------------------------------------------------------------------------------------------------------------------------------------------------------------------------------------------------------------------------------------------------------------------------------------------------------------------------------------------------------------------------|
|                                                                             | <p>surface &gt; 1 qcm); (4) relative humidity (0 = dry; 3 0 = humid)</p> <p><b>2. Bacteriological</b> (EVA only):<br/>dry swab on the EVA balloon + evaluation in laboratory</p>                                                                                                                                                                                                                                                                                                                                                                                                                                                       |
| Statistics                                                                  | Exp. 1 + 2 results for visual + bacteriological analysis were compared (paired + unpaired t-tests; correlations), p value 0.01                                                                                                                                                                                                                                                                                                                                                                                                                                                                                                         |
| <b>Setting, Participants</b>                                                |                                                                                                                                                                                                                                                                                                                                                                                                                                                                                                                                                                                                                                        |
| <b>Sample size</b>                                                          | 39 severe restrictive ventilated patients                                                                                                                                                                                                                                                                                                                                                                                                                                                                                                                                                                                              |
| <b>Sex</b>                                                                  | Not specified                                                                                                                                                                                                                                                                                                                                                                                                                                                                                                                                                                                                                          |
| <b>Age of participation</b>                                                 | Not specified                                                                                                                                                                                                                                                                                                                                                                                                                                                                                                                                                                                                                          |
| <b>Kind of disease</b>                                                      | <ul style="list-style-type: none"> <li>- <b>All</b> patients: functional tetraplegy with chronic alveolar hypoventilation</li> <li>- <b>24/39</b> Duchenne muscular dystrophies</li> <li>- <b>4/39</b> congenital myopathies</li> <li>- <b>4/39</b> spinal muscular atrophies</li> <li>- <b>4/39</b> tetraplegics</li> <li>- <b>2/39</b> polyneuropathies</li> <li>- <b>1/39</b> limb girdle dystrophy</li> </ul>                                                                                                                                                                                                                      |
| <b>Kind of artificial ventilation (incl. duration)</b>                      | <ul style="list-style-type: none"> <li>- <b>All</b> respirators volumetric</li> <li>- <b>All</b> patients ventilated at home with EVA for &gt;12 months (mean time ventilated: 7.7 years)</li> <li>- <b>All</b> patients: ventilation + tubing with valve between 6-12 months</li> <li>- <b>Group (T): 16/39</b> tracheostomy (circuits connected to humidifier + water trap)</li> <li>- <b>Group (N): 23/39</b> noninvasively with nasal mask (13 silicone custom made mask; 10 commercial mask)</li> <li>- <b>24/39</b> continuously ventilated (16 by tracheostomy; 8 by mouthpiece during the day/ nasal mask at night)</li> </ul> |
| <b>Family participation</b>                                                 | Not specified                                                                                                                                                                                                                                                                                                                                                                                                                                                                                                                                                                                                                          |
| <b>Concept of home-based setting/Licensed beds</b>                          | <ul style="list-style-type: none"> <li>- <b>11/39</b> lived in institution</li> <li>- <b>28/39</b> lived at home</li> </ul>                                                                                                                                                                                                                                                                                                                                                                                                                                                                                                            |
| <b>Professions/Qualifications involved/Duration professional employment</b> | Not specified                                                                                                                                                                                                                                                                                                                                                                                                                                                                                                                                                                                                                          |
| <b>Cooperation (e. g. Lung specialist, Weaning centre)</b>                  | Not specified                                                                                                                                                                                                                                                                                                                                                                                                                                                                                                                                                                                                                          |
| <b>Key Findings - Hygiene management</b>                                    |                                                                                                                                                                                                                                                                                                                                                                                                                                                                                                                                                                                                                                        |

**Appendix 3: Data Charting Sheets.** Hygiene Management for Long-term Ventilated Persons in the Home Health Care Setting: A Scoping Review

|                                                                                                                       |                                                                                                                                                                                                                                                                                                                                                                                                                                                                                                                                                                                                                                                                                                                                                                                                                                                                                                    |
|-----------------------------------------------------------------------------------------------------------------------|----------------------------------------------------------------------------------------------------------------------------------------------------------------------------------------------------------------------------------------------------------------------------------------------------------------------------------------------------------------------------------------------------------------------------------------------------------------------------------------------------------------------------------------------------------------------------------------------------------------------------------------------------------------------------------------------------------------------------------------------------------------------------------------------------------------------------------------------------------------------------------------------------|
| Quality management for hygiene, e. g. Infection control practitioner, duration h for infection prevention and control | Not specified                                                                                                                                                                                                                                                                                                                                                                                                                                                                                                                                                                                                                                                                                                                                                                                                                                                                                      |
| ... - Training /education (incl. in- outdoor training)                                                                | <p><b>Patients:</b></p> <ul style="list-style-type: none"> <li>- Maintenance advice for HVC (*) is not well adhered to (even taught + written)</li> <li>- Need to be taught in hospital + repetition at regular intervals with short trainings</li> <li>- 10-point scale could be used to send feedbacks to patients</li> </ul> <p>(*) “Low-Level Decontamination + Cleaning”-Protocol:</p> <ul style="list-style-type: none"> <li>- To clean macroscopic spots with detergent + hot water followed by a 15min HAC-bath (diluted to 5%)</li> <li>- 2x per month: circuit, tubing + interfaces decontamination by HAC</li> <li>- To clean cannulae of tracheostomy with hydrogen peroxides (oxygen water)</li> </ul> <p><b>Professionals:</b></p> <ul style="list-style-type: none"> <li>- Clearly need additional training sessions to improve their expertise in respiratory equipment</li> </ul> |
| ... - Staff hygiene (incl. PPE, Hand hygiene)                                                                         | Not specified                                                                                                                                                                                                                                                                                                                                                                                                                                                                                                                                                                                                                                                                                                                                                                                                                                                                                      |
| ... - Relative/visitors (incl. Physicians/Therapists)                                                                 | Not specified                                                                                                                                                                                                                                                                                                                                                                                                                                                                                                                                                                                                                                                                                                                                                                                                                                                                                      |
| ... - Cleaning and disinfection aspects                                                                               | <p>2 different cleanings are described in the study:</p> <ul style="list-style-type: none"> <li>- “Low-Level Decontamination + Cleaning”-Protocol (<i>s. category “training” above</i>)</li> <li>- Cleaning by investigator during Exp. 2 (<i>s. category “methodology” above</i>)</li> </ul> <p>ICU-hygiene protocols are not appropriate for home use, because they only recommend inadequate disinfection + fail in advising simple washing<br/>         → need for maintenance protocols aiming for cleanliness, not for sterility<br/>         → <b>Recommendation by authors:</b> low-level-disinfection in dishwasher</p> <ul style="list-style-type: none"> <li>- All pieces of the circuit (masks, EVAs...) at 70°C + 90min</li> <li>- Available in most families + institutions</li> <li>- Easy of use</li> </ul>                                                                        |
| ... - Handling of medical devices                                                                                     | ( <i>s. “cleaning + disinfection aspects” above</i> )                                                                                                                                                                                                                                                                                                                                                                                                                                                                                                                                                                                                                                                                                                                                                                                                                                              |
| ... - Waste management                                                                                                | Not specified                                                                                                                                                                                                                                                                                                                                                                                                                                                                                                                                                                                                                                                                                                                                                                                                                                                                                      |
| ... - Infectious critical activities (incl. MRSA, Screening, Surveillance)                                            | Not specified                                                                                                                                                                                                                                                                                                                                                                                                                                                                                                                                                                                                                                                                                                                                                                                                                                                                                      |
| ... - Caring for persons (prevention and infection control)                                                           | Not specified                                                                                                                                                                                                                                                                                                                                                                                                                                                                                                                                                                                                                                                                                                                                                                                                                                                                                      |
| ... - Handling of medication                                                                                          | Not specified                                                                                                                                                                                                                                                                                                                                                                                                                                                                                                                                                                                                                                                                                                                                                                                                                                                                                      |
| ... - Laundry hygiene                                                                                                 | Not specified                                                                                                                                                                                                                                                                                                                                                                                                                                                                                                                                                                                                                                                                                                                                                                                                                                                                                      |
| ... - Kitchen hygiene                                                                                                 | Not specified                                                                                                                                                                                                                                                                                                                                                                                                                                                                                                                                                                                                                                                                                                                                                                                                                                                                                      |

### Appendix 3: Data Charting Sheets. Hygiene Management for Long-term Ventilated Persons in the Home Health Care Setting: A Scoping Review

| Microbiological findings                                                                                                                                                                                                                                                                                                                                                                                                                                                                                                                                                                                                                                                                                                                                                                                                                                                                                                                                                                                                                                                                                                                    |  |
|---------------------------------------------------------------------------------------------------------------------------------------------------------------------------------------------------------------------------------------------------------------------------------------------------------------------------------------------------------------------------------------------------------------------------------------------------------------------------------------------------------------------------------------------------------------------------------------------------------------------------------------------------------------------------------------------------------------------------------------------------------------------------------------------------------------------------------------------------------------------------------------------------------------------------------------------------------------------------------------------------------------------------------------------------------------------------------------------------------------------------------------------|--|
| <p><b>Experiment 1:</b></p> <ul style="list-style-type: none"> <li>- Dirtiness was worse in (T) than in (N)</li> <li>- EVA in (T) were more contaminated than in (N)</li> <li>- Contamination rates (N): 22% (no presence of PPO)</li> <li>- Contamination rate (T): 81% (19% were PPO)</li> <li>- Significant correlation was found between the dirtiness of the complete tube + EVA</li> <li>- 69% of EVA + 56% of circuits were visually dirty</li> <li>- Circuits from patients living at home were visually cleaner than those from patients living in institutions</li> <li>- 46% of the valves were contaminated by microorganisms + 22% by fungi (seldom contaminated by potentially pathogenic organisms)</li> </ul> <p><b>Experiment 2:</b></p> <ul style="list-style-type: none"> <li>- Remained dirty after dishwasher cleaning (HAC bath): 14% (64%) of dirty EVA → EVA cleanliness was significantly better after dishwasher cleaning with similar bacteriological decontamination</li> <li>- choice of the dishwasher did not play any role in the quality of cleaning because all recent machines are equivalent</li> </ul> |  |
| Conclusion/Limitations                                                                                                                                                                                                                                                                                                                                                                                                                                                                                                                                                                                                                                                                                                                                                                                                                                                                                                                                                                                                                                                                                                                      |  |
| <p><b>Conclusion:</b></p> <ul style="list-style-type: none"> <li>- Circuits from patients living at home were visually cleaner than those from patients living in institutions → nurses in institutions need additional training sessions to improve their expertise in respirator equipment maintenance</li> <li>- Maintenance advice for HVC is not well adhered to → patients + their families need trainings in hospital to demonstrate the utility of simple basic hygiene</li> <li>- Dishwasher cleaning is more efficient than chemical HAC-bath → low-level disinfection is efficient + possible for families, patients + institutions</li> </ul> <p><b>Notes for Review:</b></p> <ul style="list-style-type: none"> <li>- There are no limitations discussed!!</li> <li>- Method of visual assessment remains unclear (10 point scale + 4 criteria of severity) + why &lt; 2/10 decelerated as “dirty”?</li> </ul>                                                                                                                                                                                                                 |  |

#### Abbreviations:

EVA = expiratory valves

HAC = Hospital Antiseptic Concentrate

HVC = home ventilation circuits

ICU = intensive care unit

MV = mechanical ventilation
